1     **Alzheimer's disease brain-derived tau-containing extracellular vesicles: Pathobiology and**  
2                                   **GABAergic neuronal transmission**

3  
4     Zhi Ruan<sup>1</sup>, Dhruba Pathak<sup>1,2</sup>, Srinidhi Venkatesan Kalavai<sup>1</sup>, Asuka Yoshii-Kitahara<sup>1</sup>, Satoshi  
5     Muraoka<sup>1</sup>, Kayo Takamatsu-Yukawa<sup>1</sup>, Nemil Bhatt<sup>4</sup>, Jianqiao Hu<sup>1</sup>, Yuzhi Wang<sup>1</sup>, Samuel  
6     Hersh<sup>1</sup>, Santhi Gorantla<sup>3</sup>, Rakez Kaye<sup>4</sup>, Howard E. Gendelman<sup>3</sup>, Seiko Ikezu<sup>1</sup>, Jennifer I.  
7                                   Luebke<sup>2,5</sup> and Tsuneya Ikezu<sup>1,5,6</sup>

8  
9     <sup>1</sup>Department of Pharmacology & Experimental Therapeutics, Boston University School of  
10     Medicine, Boston, MA 02118, USA; <sup>2</sup>Department of Anatomy & Neurobiology, Boston  
11     University School of Medicine, Boston, MA 02118, USA; <sup>3</sup>Department of Pharmacology &  
12     Experimental Neurosciences, University of Nebraska Medical Center, Omaha 68198, NE, USA;  
13     <sup>4</sup>Department of Neurology, University of Texas Medical Branch, Galveston, TX, USA; <sup>5</sup>Center  
14     for Systems Neuroscience, Boston University, Boston, MA 02118; <sup>6</sup>Department of Neurology and  
15     Alzheimer's Disease Center, Boston University School of Medicine, Boston, MA 02118, USA

16  
17     Corresponding author: Tsuneya Ikezu, MD, PhD, Professor of Departments of Pharmacology and  
18     Experimental Therapeutics and Neurology, Alzheimer's Disease Center, Center of Systems  
19     Neurosciences, Boston University School of Medicine. Email: [tikezu@bu.edu](mailto:tikezu@bu.edu)

20  
21     **Key words:** Alzheimer's disease, electrophysiology, extracellular vesicle; GABAergic neuron;  
22                                   microtubule-associated protein tau, mouse model, tauopathy

23

24 **Abstract**

25 Extracellular vesicles (EVs) propagate tau pathology for Alzheimer's disease (AD). How EV  
26 transmission influences AD are, nonetheless, poorly understood. To these ends, the  
27 physicochemical and molecular structure-function relationships of human brain-derived EVs,  
28 from AD and prodromal AD (pAD), were compared to non-demented controls (CTRL). AD EVs  
29 were shown to be significantly enriched in epitope-specific tau oligomers versus pAD or CTRL  
30 EVs assayed by dot-blot and atomic force microscopy tests. AD EVs were efficiently  
31 internalized by murine cortical neurons and transferred tau with higher aggregation potency than  
32 pAD and CTRL EVs. Strikingly, inoculation of tau-containing AD EVs into the outer molecular  
33 layer of the dentate gyrus induced tau propagation throughout the hippocampus. This was seen in  
34 22 months-old C57BL/6 mice at 4.5 months post-injection by semiquantitative brain-wide  
35 immunohistochemistry tests with multiple anti-phospho-tau (p-tau) antibodies. Inoculation of the  
36 equal amount of tau from CTRL EVs or as oligomer or fibril-enriched fraction from the same  
37 AD donor showed little propagation. AD EVs induced tau accumulation in the hippocampus as  
38 oligomers or sarkosyl-insoluble proteins. Unexpectedly, p-tau cells were mostly GAD67<sup>+</sup>  
39 GABAergic neurons and to a lesser extent, GluR2/3<sup>+</sup> excitatory mossy cells, showing  
40 preferential EV-mediated GABAergic neuronal tau propagation. Whole-cell patch clamp  
41 recording of Cornu Ammonis (CA1) pyramidal cells showed significant reduction in the  
42 amplitude of spontaneous inhibitory post-synaptic currents. This was accompanied by reductions  
43 in c-fos<sup>+</sup> GAD67<sup>+</sup>GABAergic neurons and GAD67<sup>+</sup> GABAergic neuronal puncta surrounding  
44 pyramidal neurons in the CA1 region confirming reduced interneuronal projections. Our study  
45 posits a novel tau-associated pathological mechanism for brain-derived EVs.

46

## 47 **Introduction**

48 Accumulation of the misfolded microtubule-associated protein tau is a neuropathological  
49 hallmark of Alzheimer's disease (AD). Tau is closely associated with AD cognitive decline [3].  
50 Abnormally aggregated and phosphorylated tau (p-tau) first appears in the entorhinal cortex at  
51 the disease' prodromal stage spreading in hierarchical patterns to the hippocampal regions then  
52 throughout the neocortex [9]. A growing body of evidence supports a prion-like cell-to-cell  
53 transmission for tau. Indeed, extracellular tau is seen to be internalized into healthy cells, where  
54 templated misfolding occurs leading to tau aggregates. This is then followed by another cycle of  
55 tau spread heralded by its cell-based secretion. Tau is mostly secreted in free form. A minor  
56 fraction of tau is associated with extracellular vesicles (EVs) in the cerebrospinal fluid (CSF) and  
57 blood of both AD and control (CTRL) patients [2, 10, 28, 61, 76]. The levels of free tau in CSF  
58 and in neuron-derived plasma EV tau from patients with mild cognitive impairment (MCI) or  
59 AD correlate with disease progression [2, 72] suggesting potential pathogenic roles of both forms  
60 of tau. Whether EV and free form tau contribute differently to tau propagation remains  
61 unresolved. A disease-associated role for paired helical filament (PHF)-tau from AD or other  
62 tauopathy brains was demonstrated following its inoculation into mouse brains leading to tau  
63 neuropathology [33, 54]. Notably, EVs isolated from transgenic tau mouse brains, AD plasma, or  
64 human induced pluripotent stem cells (iPSCs) expressing recombinant mutant tau also initiate  
65 propagation of tau in mouse brain tissues [5, 57, 71]. Pharmacologic inhibition of exosome  
66 synthesis significantly reduces tau propagation [4, 8]. The molecular mechanisms of cell-to-cell  
67 transmission of EV and free tau aggregates via uptake and secretion were subjects of intense  
68 investigation [10, 16, 60]. While the mode of uptake of free tau appears dependent on its  
69 conformational and post-translational modifications [24, 38, 48], EV tau uptake is affected by its

70 surface proteins. EVs can target specific cell types by the interaction between EV and cell  
71 surface proteins [68]. To understand molecular composition of human brain-derived EVs, we  
72 have recently developed a separation protocol of human and mouse brain-derived EVs, by which  
73 we successfully enriched EVs with limited contamination from cytosolic components including  
74 the endoplasmic reticulum and Golgi [51, 53]. Our proteomic profiling of AD and CTRL brain-  
75 derived EVs identified glia-derived EV molecules enriched in AD cases and significantly  
76 differentially expressed proteins, which can distinguish AD from CTRL cases with 88%  
77 accuracy by a machine learning approach [51]. Furthermore, EVs isolated from interleukin (IL)-  
78  $1\beta$ -stimulated human primary astrocytes showed increased expression of integrin- $\beta 3$  (ITGB3),  
79 which was critical for neuronal EV uptake [74]. These data demonstrate that disease-associated  
80 pathologies such as glial inflammation can alter the molecular composition and neuronal uptake  
81 of EVs affecting their potency of tau spread.

82 There has been no comprehensive analysis of tau pathology development after the injection of  
83 human brain-derived EVs from CTRL or AD patients. Moreover, to fully understand the  
84 difference in potency between EV-associated and vesicle free tau, it is critical to compare  
85 propagation induced by different form of tau isolated from the same donor. Here we aimed to  
86 characterize brain-derived EVs separated from AD, prodromal AD (pAD) and age/sex-matched  
87 CTRL for their biophysical, biochemical, and neurobiological properties as well as for tau  
88 pathology after injection in the outer molecular layer (OML) of dentate gyrus (DG) in aged  
89 C57BL/6 (B6) mice. The recipient mice were tested by immunohistochemical and biochemical  
90 characterization of tau accumulation in the hippocampus. We also assessed the difference in tau  
91 pathology development after intrahippocampal injections of EV-, tau oligomer- and tau fibril-  
92 enriched fractions in mice. Finally, CA1 pyramidal neurons in the hippocampus of the recipient

93 mice were assessed with whole-cell patch clamp recording to determine whether tau  
94 accumulation induces alterations in neurophysiological function.

95

## 96 **Results**

### 97 **Detection of tau oligomers in AD and pAD brain-derived EVs**

98 EVs consist of cell-derived lipid bilayer classified as exosomes or microvesicles. Exosomes are  
99 30-150nm in size secreted after the fusion of endosomes with cell surface. Microvesicles are  
100 100-1000nm in size secreted by outward budding of plasma membranes [21, 22, 60, 75]. They  
101 were originally part of the clearance system of unmetabolized cell composites. However,  
102 accumulative evidence suggests that EVs play critical roles for spreading pathological proteins.  
103 In this way they contribute to the pathobiology of neurodegenerative diseases [4, 18, 27, 32].  
104 While tau is found both in exosomes and microvesicles from tauopathy mouse brains,  
105 neuroblastoma cells, CSF, and plasma in AD patients [2, 23, 28, 61] no study to date, has  
106 reported detailed analysis of AD brain-derived EVs. We first isolated exosome-enriched EV  
107 fractions from AD, pAD, and CTRL patient brain samples using the previously published  
108 protocol (Supplementary Table S1 for patients' demographics) [51, 53]. Briefly, fresh-frozen  
109 post mortem brain tissues containing gray matter were lightly minced followed by the sequential  
110 centrifugation and discontinuous sucrose density gradient ultracentrifugation (Fig. 1a). Analyses  
111 of the isolated fractions by transmission electron microscopy (TEM, Fig. 1b) and nanoparticles  
112 tracking analysis (NTA, Fig. 1c) demonstrated enrichment of brain EVs with a size of exosomes  
113 [11]. There was no difference in terms of EV particle concentration or size among groups (Fig.  
114 1d-e). ELISA analysis of total tau, A $\beta$ 40, and A $\beta$ 42 in EVs show total tau abundance without  
115 A $\beta$ 40; whereas A $\beta$ 42 are enriched in AD EVs (Supplementary Table S2). Considering that tau

116 oligomers are in the nanometer size [17], we postulated that brain-derived EVs contain tau in  
117 oligomer forms. Indeed, there was a significantly higher amount of oligomeric tau in EVs  
118 derived from AD compared to CTRLs. These data were confirmed by tau oligomer-specific  
119 monoclonal antibodies TOMA-1 and TOMA-2, but not by TOMA-3 or TOMA-4 (Fig. 1f-I and  
120 Supplementary Fig. S1). There was no difference in immunoreactivity confirmed by tau  
121 oligomer polyclonal antibodies T22 and T18 among three groups (Fig. 1j-k). In addition, atomic  
122 force microscopy (AFM) analysis of detergent-insoluble fraction of AD and pAD but not of  
123 CTRL EVs detected globular particles. These were uncovered at the mode height 4-6 nm  
124 consistent with tau oligomers (Fig. 1l-m). Taken together, these data suggest that AD and pAD  
125 EVs are enriched in tau oligomers compared to CTRLs, indicating EV tau seeding potency and  
126 pathogenic activities.

127

### 128 **Increased uptake of AD EVs by primary neurons leading to tau transfer**

129 Numerous mechanisms of EV uptake have been proposed including endocytosis,  
130 macropinocytosis, phagocytosis, caveolae-dependent, clathrin-dependent, lipid raft-dependent  
131 endocytosis and membrane fusion [68]. Protein-protein interaction between EVs and cell surface  
132 molecules on the recipient cells can facilitate the binding of EVs and subsequent endocytosis  
133 [50, 68]. For example, interaction between the integrin family on EVs and intercellular adhesion  
134 molecules (ICAMs) [49] or extracellular matrix, including fibronectin and laminin, on the  
135 recipient cell surface are important for EV binding [58, 67, 68]. Furthermore, heparin sulfate  
136 proteoglycan (HSPG) [15] and galectin [7] can mediate EV uptake. We hypothesized that disease  
137 conditions alter molecular complex of EV surface and change the efficiency of EV uptake. We  
138 tested brain derived-EVs for their uptake by primary cultured murine neurons *in vitro*. After

139 seven days of neuronal differentiation, the cells were incubated for 24 hours with tau containing  
140 PKH26-labeled EVs isolated from the brain tissue of AD, pAD and CTRL samples (AD-EV tau,  
141 pAD-EV tau, and CTRL-EV tau) and examined for the EV uptake as previously described [74]  
142 (Fig. 2a). The neuronal EV uptake was significantly higher in AD EVs compared to CTRL EVs,  
143 while the neuronal uptake of pAD EVs was similar to CTRL EVs (Fig. 2b-c). Concomitantly, the  
144 transfer efficiency of tau from EVs to neurons normalized by the original tau input was  
145 significantly higher in AD EVs compared to CTRL EVs (Fig. 2d). We labeled the supernatant  
146 with PKH26 as a negative control at the last ultracentrifugation wash-step of the EV isolation  
147 and applied it to neuronal cells. There was no PKH26 positivity found in supernatant-applied  
148 neurons (data not shown). EV surface protein repertoires are known to reflect their biological  
149 condition and cell-type specificity of parental cells [39, 68]. Our recent proteome of human  
150 brain-derived EVs revealed that CTRL EVs expressed more protein of neuronal origin while AD  
151 EVs showed more glial dominance. This may reflect the neuroinflammatory condition recently  
152 described as the third core AD pathogenesis following A $\beta$  plaques and neurofibrillary tangles  
153 [41]. Thus, these results corroborate an idea that a selective AD EV surface molecules may  
154 facilitate their uptake by recipient neurons. Finally, to understand if EV-tau has different tau  
155 seeding activity dependent on the disease conditions, we employed a FRET sensor-based tau  
156 seeding assay as previously described [36]. Astonishingly, the AD EVs showed significantly  
157 higher seeding activity compared to pAD and CTR-EVs group (Fig. 2e), suggesting higher  
158 potency of AD EVs to induce tau pathology. In summary, the data demonstrate pathogenic  
159 functions of AD EVs with efficient transfer of tau and high seeding potency.

160

161 **Inoculation of AD EVs propagate tau pathology in aged mice**

162 Since we observed efficient EV uptake and transfer of EV tau into primary mouse cortical  
163 neurons and significant tau seeding activities in AD EVs, we further tested whether brain derived  
164 EVs can initiate tauopathy in 2 months-old B6 mice after an intrahippocampal injection. Brain  
165 derived EVs containing tau isolated from the brain tissue of AD, pAD, and CTRL cases were  
166 unilaterally injected in the OML of the DG (Fig. 3a). The amount of injected tau (300 pg/ $\mu$ l, 1ul  
167 injection) was much lower than the one used for the previous tau propagation studies (1-8  $\mu$ g)  
168 [33, 54]. Its concentration was in a range of the extracellular tau concentration in mouse  
169 interstitial fluid of the central nervous system [73]. Immunofluorescence against phosphorylated  
170 tau (p-tau) antibody AT8 (pSer202/pSer205) detected a considerable, yet not an abundant,  
171 amount of AT8<sup>+</sup> cells in the hippocampal region of AD and pAD EVs injected female mice  
172 (Supplemental Fig. S2, left) but not in male mice (data not shown). A previous study reported a  
173 more enhanced tau propagation induced by fibril tau injection with aged B6 mice in comparison  
174 to young mice [33]. Therefore, we decided to use aged female mice as recipients to determine if  
175 tau pathology induced by brain-derived EVs reflects the donor's disease conditions. Brain-  
176 derived EVs were isolated from 2 donors of each AD, pAD, and CTRL cases and from *Mapt*  
177 knockout (Tau KO) mice as the control. Each EV sample (containing 300 pg tau/injectate for  
178 human brain derived EVs), or saline as an injection control, were unilaterally injected into the  
179 OML of the DG of ~18-months-old B6 female mice (Fig. 3a). The spread of tau pathology was  
180 evaluated by immunofluorescence against AT8 in the hippocampal region at 4.5 months post  
181 injection (Fig. 3b, Supplementary Fig. S2, right, and S3a). Interestingly, abundant perikaryal  
182 AT8<sup>+</sup> inclusions were detected in both ipsilateral and contralateral sides of the hippocampal  
183 region including the Cornus Ammonis 1 (CA1), CA3, dentate granule cells, subgranular zone,  
184 and hilus in the AD and pAD EVs groups, suggesting tau transfer between anatomically



185 connected pathways (Fig. 3b). Semiquantitative brain-wide mapping of tau pathologies revealed  
186 that AT8<sup>+</sup> pathogenic tau was accumulated throughout the hippocampus, predominantly  
187 distributed in the caudal hippocampal hilus, in the mouse brains injected with AD or pAD EVs,  
188 while CTRL EVs injected mouse brains showed very little AT8 positivity (Fig. 3c). Notably, the  
189 percentage of the area occupied by AT8<sup>+</sup> cells in the hippocampal region was significantly higher  
190 in AD EVs as compared to CTRL EVs, Saline or Tau KO EVs groups (Fig. 3d). There was no  
191 significant difference between pAD and CTRL EVs injected groups and no AT8<sup>+</sup> staining was  
192 observed in saline group (Fig. 3d, Supplementary Fig. S3a). All AT8<sup>+</sup> neurons were negative for  
193 human tau as determined by immunofluorescent staining against human tau-specific monoclonal  
194 HT7 (data not shown), indicating that endogenous mouse tau was recruited and aggregated by  
195 the inoculation of human brain derived EV tau. A growing body of evidence suggests that  
196 misfolded tau tends to be truncated and frequently consists of different conformers or structural  
197 polymorphisms, deciphering the stages and disease of tauopathy [25, 26, 29, 64, 77]. Therefore,  
198 we performed neuropathological analysis of tau by immunohistochemistry using conformation-  
199 specific (Alz50 and MC1) and p-tau epitope-specific monoclonal (CP13: pSer202 tau, PS422:  
200 pS422 tau, and PHF1:pSer396 and pSer404). All 5 antibodies detected misfolded or  
201 phosphorylated tau mainly in the hilus of hippocampal region with AD and pAD EV groups  
202 (Supplemental Fig. S3b-f).

203 We next examined whether EV-tau could induce templated misfolding of original tau aggregates  
204 in endogenous tau of the recipient mice. Aggregated tau was extracted from the recipient mouse  
205 brains via sarkosyl solubilization and sequential centrifugation, and immunoblotted using Tau-5  
206 and PHF1 monoclonal antibodies as previously described (Fig. 3e) [1, 40]. We observed a  
207 significant increase in oligomeric tau in the fraction S1p of both AD and pAD EV injected

208 mouse hippocampi as compared to the CTRL EV group, determined by both Tau-5 (total tau)  
209 and PHF1 immunoblotting (Fig. 3f-g). The amount of sarkosyl-insoluble tau in the fraction P3  
210 was also significantly elevated in AD EV injected mouse hippocampi when compared to CTRL  
211 EV group (Fig. 3f-g). These data indicate that AD EV inoculation induced accumulation of  
212 oligomeric and fibrillar tau, while pAD EV inoculation induced accumulation of oligomeric tau.  
213 Taken together, these data show the efficient induction of tau propagation in the hippocampus of  
214 the aged B6 female mouse brain after the injection of the AD EVs containing physiological  
215 concentration of tau. Conformational changes of tau in the recipient mice appear to reflect the  
216 original tau conformation of AD EVs and pAD EVs, which were also reported with mice injected  
217 with AD brain-derived tau fibrils [33].

218

219 **Inoculation of AD EVs show more tau propagation as compared to the inoculation of an**  
220 **equal amount of tau oligomer or fibril-enriched fractions from the same AD brain tissue**

221 To determine how propagation of tau pathology may differ between the injection of EV-  
222 associated or free form tau, we compared EV tau with oligomer and fibrillar tau derived from the  
223 same donor for tau pathology development. Fibril or oligomeric tau were isolated from the same  
224 AD EV donor as S1p and P3 fractions according to the previous publications [1, 33, 40]. The p-  
225 tau immunoreactivity and structure of the isolated tau aggregates were examined by the western  
226 blot using PHF1 antibody and AFM (Fig. 4a-b). AFM images showed mostly small oligomer like  
227 globular particles (6-8nm in height) in EV and tau oligomer preparation and large globular  
228 structures (30-70nm in height) in sonicated tau fibril preparations (Fig. 4a), which is consistent  
229 with the description of the fibril structure as previously reported [30]. We observed mainly  
230 monomeric PHF1<sup>+</sup> band in p-tau in EV and tau oligomer enriched samples, and trimeric PHF1<sup>+</sup>

231 band in fibril enriched sample (Fig. 4b), validating their oligomeric and fibrillar conformation.  
232 We injected each sample of AD EV, oligomers, and fibrils containing an equivalent amount of  
233 tau (300pg / 1 $\mu$ L injectate) into the OML of the DG of 18-month-old B6 female mice. At 4.5  
234 months after the injection, mice were euthanized and tested for tau pathology by  
235 immunofluorescence against AT8. We observed strong AT8 positivity in the injection site with  
236 all groups, suggesting successful intrahippocampal injections. In addition, AT8<sup>+</sup> signal was also  
237 seen as perikaryal inclusions or neuropil staining in the cortex along the needle tract (Fig. 4c, top  
238 panels, Supplementary Fig. S4, left), whereas only neuropil accumulation of tau with oligomer or  
239 fibril tau injected mice, which is in agreement with the previous study [33] (Fig. 4c, top panels,  
240 Supplementary Fig. S4, middle and right). Moreover, compared to AT8<sup>+</sup> tau pathology observed  
241 in the entire hippocampal region with AD EV injected mice as described previously, fibril or  
242 oligomer tau injected mice did not show any AT8<sup>+</sup> perikaryal inclusions in the entire  
243 hippocampus (Fig. 4c, bottom panels, d). Consistent with the previous reports [33, 44], injecting  
244 2  $\mu$ g of oligomer or fibril tau from AD brain tissues in the aged B6 mice induced robust tau  
245 pathology in the hippocampal region, thus providing the fidelity of our oligomer or fibril tau  
246 isolation methods (Supplementary Fig. S5a-c). These findings recapitulated our previous study  
247 showing that inoculation of microglia-derived EVs containing 5ng of aggregated tau, but not  
248 inoculation of the equal amount of free tau aggregates, was able to induce tau propagation in the  
249 DG of B6 mice [4]. Previous studies reported that inoculation of 1-8  $\mu$ g of fibril tau from AD  
250 patients into wildtype (B6 and B6/C3H F1) mouse brains could induce tau propagation as early  
251 as 3 months post injection [33, 54]. Potency of propagation may be varied between the donors  
252 and the type of tauopathies [54], therefore it is difficult to compare the results between these  
253 studies. To the best of our knowledge, this is the first report of increased tau propagation potency

254 in EV-tau as compared to vesicle free tau isolated from the same human AD brain tissue. A  
255 previous study reported that immunodepletion of tau from the AD brain derived tau fibril  
256 diminished tau aggregation activity *in vitro* or propagation *in vivo* [33]. Moreover, addition of  
257 remaining components after the immunodepletion of AD-tau into fibril tau did not alter the  
258 outcome of abovementioned experiments, suggesting that tau was the essential component to  
259 initiate tau propagation but not tau associated molecules [33]. Our results also indicated that EVs  
260 without tau do not initiate tau propagation *in vivo* as we barely observed tau propagation by  
261 injecting Tau KO EVs. We, however, confirmed that EVs certainly enhanced propagation  
262 potency of tau. The discrepancy between these experiments may be due to the potential removal  
263 of EVs associated with extracellular tau when immunodepletion of tau was performed.

264

### 265 **Preferential EV-mediated tau propagation to GABAergic inhibitory neurons**

266 Recent work indicates that specific type of organs or cells, where EVs are transferred, could be  
267 determined by the enriched proteins on the EV surface [68]. For example, previous studies found  
268 that specific EV proteins, such as integrins or tetraspanins, play critical roles for the deliveries of  
269 cancer-derived EVs to specific organs or cell types [37, 55]. Given the fact that some EV surface  
270 proteins are specifically expressed on AD EVs [51], we speculated that the evaluation of EV-  
271 mediated transfer of tau to aged mouse brains would uncover cell type-specific tau transfer  
272 mechanisms. To determine which neuronal cell type preferentially accumulates tau, we  
273 performed double immunostaining using the markers for p-tau (AT8) and GABAergic  
274 interneurons (GAD67 and parvalbumin, PV) or excitatory neurons (Neurogranin, NG, and  
275 glutamate receptor 2/3, GluR2/3, mossy cell marker) [69]. Surprisingly, most of AT8<sup>+</sup> cells were  
276 GAD67<sup>+</sup> interneurons in the CA1, CA3, and DG region in AD EV and pAD EV injected mice

277 (Fig. 5a-b). Moreover, a subset of PV<sup>+</sup> neurons were also co-localized with AT8 (Supplementary  
278 Fig. S6a). We found that the ratio of GAD67<sup>+</sup>AT8<sup>+</sup> cells over total GAD67<sup>+</sup> cells were  
279 significantly higher in the DG and CA3 region in AD EV and pAD EV, and in the CA1 in AD  
280 EV compared to CTRL EV injected mice (Fig. 5c-e), although there was no significant reduction  
281 in the total number of GAD67<sup>+</sup> neurons in those regions. No difference was observed in any of  
282 the regions between Tau KO EV and CTRL EV groups. In contrast, no NG<sup>+</sup> excitatory neurons  
283 were AT8<sup>+</sup> in the DG of hippocampus (Supplementary Fig. S6b). We, however, observed that  
284 some of AT8<sup>+</sup> cells were GluR2/3<sup>+</sup> mossy cells in the hilus region (Fig. 5f). Quantification of  
285 AT8<sup>+</sup> cells in the hippocampal region in AD EV injected mice revealed that 64% and 23% of the  
286 AT8<sup>+</sup> cells were GAD67<sup>+</sup> inhibitory neurons and GluR2/3<sup>+</sup> excitatory mossy cells, respectively  
287 (Fig. 5g). Multiple lines of evidence have supported the notion that GABAergic interneuron  
288 dysfunction could be one of critical components in the early pathogenesis of AD. The decreased  
289 levels of GABA transmitter have been reported in the CSF of AD patients or elderly without  
290 cognitive impairment [6, 78] and in their post-mortem tissues especially in the temporal cortex,  
291 followed by the hippocampus, frontal cortex, and thalamus of AD patients [31]. AD patients  
292 showed loss of specific somatostatin<sup>+</sup> interneurons in the hippocampus and cortex [13, 19].  
293 Moreover, 7-21% of sporadic AD patients show at least one episode of seizure during the illness  
294 [56], and administration of anti-epileptic drug, levetiracetam, was effective to improve cognitive  
295 function in the elderly for those with normal memory, MCI, and AD patients [62, 70]. Together,  
296 our data indicate that EVs may play a critical role in tau propagation to GABAergic neurons, and  
297 suggest that EVs can be an attractive therapeutic target for the early intervention of AD.  
298

299 **AD EV and pAD EV inoculation reduced GABAergic neuronal activity and input to CA1**  
300 **pyramidal cells**

301 To determine if EV-mediated tau propagation may disrupt GABAergic neuronal functions, we  
302 examined the neuronal activity of GAD67<sup>+</sup> GABAergic neurons by immunofluorescence against  
303 c-fos. There was a significant reduction in c-fos<sup>+</sup>/ GAD67<sup>+</sup> cells in the CA1 in AD EV as  
304 compared to Tau KO EV injected mice (Fig. 6a-b). However, there was no significant difference  
305 in c-fos<sup>+</sup>/ GAD67<sup>+</sup> cells in the DG between any groups (Fig. 6c-d), suggesting decreased  
306 neuronal activity in GABAergic neurons specifically in the CA1 region by EV-mediated tau  
307 propagation. We further assessed the synaptic input of GABAergic neurons to CA1 pyramidal  
308 cells by examining the number of immunostained GAD67<sup>+</sup> puncta surrounding CA1 pyramidal  
309 neuronal cell soma. The images were captured by confocal microscope and the number of the  
310 puncta was analyzed by Imaris software (Fig. 6e). There was a significant reduction in the  
311 number of puncta in the CA1 pyramidal layer of pAD EV and decreased tendency with AD EV  
312 as compared to Tau KO EV group (Fig. 6f). There was no difference between the groups in the  
313 cell numbers of CA1 pyramidal neurons (Fig. 6g). CA1 pyramidal neurons receive abundant  
314 inhibitory inputs from GABAergic neurons [12], therefore, our results suggest possible  
315 dysregulated function in CA1 pyramidal neurons via disrupted GABAergic neuronal function  
316 after EV-mediated tau propagation.

317

318 **EV-induced alterations in intrinsic membrane properties and spontaneous inhibitory**  
319 **synaptic currents in CA1 pyramidal neurons**

320 To evaluate the functional effect of tau propagation in human brain-derived EV-inoculated  
321 mouse brains, we performed whole-cell voltage/current-clamp recordings of CA1 pyramidal

322 cells using 300  $\mu\text{m}$ -thickness acute tissue slices of mouse hippocampi from Tau KO EV, pAD  
323 EV, and AD EV groups (Fig. 7a-b). An F-I curve-generating protocol ranging from -100 pA to  
324 +120 pA square pulse current steps (increments of +20 pA) or -220 pA to +330 pA current steps  
325 (increment of +50 pA) were applied. The number of action potentials (APs) evoked by  
326 depolarizing current steps was significantly lower in pAD EV and AD EV groups compared to  
327 Tau KO EV groups as determined by repeated measurement ANOVA (Fig. 7c, e, Supplementary  
328 Table S4-5) and for pAD EV group compared to Tau KO EV group at +100 pA ( $p=0.0434$ ) and  
329 +130 pA ( $p=0.0445$ ) (Fig. 7d, f). This result is consistent with the study on another tau  
330 transgenic mouse model (aged rTg4510 mice expressing P301L tau), which show reduction in  
331 firing in hippocampal CA1 neurons [34]. The AD EV group also showed significant reduction of  
332 mean AP amplitude as compared to Tau KO EV group (Fig. 6g). Evaluation of the properties of  
333 spontaneous inhibitory and excitatory postsynaptic potentials (sIPSCs and sEPSCs) (Fig. 7h and  
334 Supplementary Table S6-8) revealed a significant reduction in the mean amplitude of sIPSCs in  
335 pAD EV group and E-I ratio of amplitude as compared to Tau KO group (Fig. 7h-i). There was  
336 no difference in sEPSC properties among the 3 groups. Taken together, these data demonstrate  
337 reduction in action potential firing rates of CA1 pyramidal neurons in the pAD EV group,  
338 reduction of AP amplitude in the AD EV group, and reduction in sIPSC amplitude in the pAD  
339 EV group, which is also reflected in the reduction in the E-I ratio of sIPSC amplitude. Thus,  
340 pathogenic tau accumulation may compromise both intrinsic excitability (evoked action potential  
341 firing rates) and inhibitory synaptic responses of CA1 pyramidal cells.

342

343 **Discussion**

344 The current study demonstrated that AD EVs efficiently initiated tau propagation in aged B6  
345 mice. This finding was validated by the *in vitro* evidence of the highly transmissible nature of  
346 AD EVs with their higher uptake by cortical neurons and increased seeding activity compared to  
347 CTRL EVs. Tau pathology was predominantly found in GABAergic neurons and to a lesser  
348 extent in mossy cells in the DG. Whole-cell patch clamp recording of CA1 pyramidal cells of  
349 recipient mice showed reduced intrinsic excitability and lower mean sIPSC amplitude indicative  
350 of intrinsic dysfunction of CA1 pyramidal cells and reduced input from interneurons. This was  
351 accompanied with reduced inhibitory synaptic markers and c-fos immunoreactivity in  
352 GABAergic neurons in the CA1 region. The preferential EV mediated tau propagation into  
353 GABAergic neurons and their reduced function posits the potential underlying mechanism in  
354 interneuron dysfunction in AD.

355 Recent advances in EV research have opened new avenues to investigate the diagnostic and  
356 pathogenic roles of EVs on neurodegenerative diseases [21, 22, 75]. Accumulating evidence now  
357 suggests that EVs carry pathogenic proteins, and EV-associated proteins or miRNAs predict  
358 disease progressions in AD [14, 72], chronic traumatic encephalopathy [66], Parkinson disease,  
359 prion disease, amyotrophic lateral sclerosis, traumatic brain injury, multiple sclerosis, and  
360 Huntington disease [22, 75]. Furthermore, overexpression of the second most AD-associated  
361 GWAS gene, Bridging integrator-1 (BIN1), enhanced release of tau via EVs *in vitro* and  
362 exacerbated tau pathology in PS19 mice *in vivo* [47]. Contribution of EVs to tau pathology  
363 development in AD patients has been questioned, however, due to the scarcity of tau in the EV  
364 fractions of biofluids. We have demonstrated here that EVs containing only 300 pg of tau  
365 successfully induced templated misfolding in endogenous tau and subsequently transferred tau  
366 pathology through the entire hippocampus in aged B6 mice, indicating that EVs are indeed



367 vehicles to transfer pathological tau. AD EVs show higher transmissibility of tau via increased  
368 uptake by recipient neurons. Our proteome analysis of AD brain-derived EVs suggests  
369 enrichment of glia-derived EVs rather than neuron-derived EVs [51]. Interestingly, recent  
370 analysis of single cell RNAseq of human AD brains showed that CD81, an established  
371 tetraspanin exosome marker, is highly expressed in the microglia module [46] together with  
372 ApoE, the most prominent AD GWAS gene [43]. Notably, APOE is a representative disease-  
373 associated / neurodegenerative microglia (DAM/MGnD) genes [42], suggesting active EV and  
374 APOE synthesis in DAM/MGnD in AD brains. CD81 and CD82 are known to regulate the  
375 integrin cluster distribution on plasma membranes to facilitate dendritic cell adhesions [59] and  
376 recruit integrins to endosomal pathway [35] respectively. In addition, our recent study  
377 demonstrates that IL-1 $\beta$ -stimulated astrocytes secrete EVs enriched in the integrin family with  
378 higher neuronal uptake efficiency, which was inhibited by an integrin-blocking peptide [74].  
379 Thus, EV uptake in AD brains could be enhanced by differentially expressed EV surface proteins  
380 due to altered cargo sorting or the origin of the cell type in neuroinflammatory conditions.  
381 Dysfunction of interneurons has been extensively reported in tauopathy animal models [45, 65].  
382 JNPL3 transgenic mice harboring *MAPT* P301L mutation show loss of hippocampal interneurons,  
383 PHF1<sup>+</sup> p-tau and MC1<sup>+</sup> misfolded tau in interneurons, and rescue of enhanced later-phase long-  
384 term potentiation by administration of GABA<sub>A</sub> receptor agonist [45]. VLW mice overexpressing  
385 human *MAPT* with 3 mutations (G272V, P301L, and R406W) show p-tau accumulation in  
386 hippocampal PV<sup>+</sup> GABAergic neurons and mossy cells in DG as early as 2 months of age [65].  
387 Reduction of GABAergic septohippocampal innervation of PV<sup>+</sup> interneurons in VLW mice  
388 suggests tau accumulation may be responsible for GABAergic neuronal loss [65]. We found that

389 EV-mediated tau propagation is explicitly in GABAergic neurons, including PV neurons  
390 followed by mossy cells, and GABAergic dysfunction was determined by both  
391 electrophysiological recording and c-fos activity, indicating the susceptibility of those neurons to  
392 tau toxicity. PV neurons are surrounded by the specific extracellular matrix (ECM), called  
393 perineuronal nets, comprised of integrin-binding versican and heparin sulfate proteoglycan  
394 (HSPG) [20]. Since EV uptake is dependent on HSPG [15], EV surface proteins such as integrins,  
395 which are known to interact with HSPG, may play a potential role on their uptake by  
396 GABAergic neurons.

397 In summary, we have revealed the highly transmissible and potent seeding activity of AD EVs  
398 with selective susceptibility of GABAergic neurons. Our study created a foundation to elucidate  
399 a novel EV-mediated tau spread mechanism, which may be relevant to interneuron dysfunction  
400 in AD.

401

## 402 **Materials and Methods**

### 403 **Animals**

404 Aged C57BL/6 (18-19 months old), Tau KO (B6.129X1-*Mapt*<sup>*tm1Hnd*</sup>/J, # 007251) and pregnant  
405 CD-1 mice were purchased from National Institute of Aging (NIA), Jackson laboratory and  
406 Charles River Laboratory, respectively. B6 mice were used for intracerebral inoculation of  
407 human brain-derived materials. Adult Tau KO mice were used for isolation of brain-derived  
408 EVs. E16 CD-1 mice were used for primary culture of cortical neurons. All animal procedures  
409 followed the guidelines of the National Institutes of Health Guide for the Care and Use of  
410 Laboratory Animals, and were approved by the Boston University Institutional Animal Care and  
411 Use Committee (IACUC).

## 412 **Isolation of EVs from AD brains**

413 Human and mouse brain-derived EVs were isolated according to our recently published methods  
414 [53]. Briefly, fresh frozen human frontal cortex gray matter was sliced with a razor blade on ice  
415 while frozen to generate 1–2 cm long, 2–3 mm wide sections. The cut sections are dissociated  
416 while partially frozen in 300  $\mu$ L of 20 units papain (# LK003178, Worthington Biochemical  
417 Corporation) in 15 mL Hibernate-E media (Thermo Fisher Scientific) at 37°C for 15 min, and  
418 protease and phosphatase inhibitors (# PI78443, Thermo Fisher Scientific) were added. The  
419 tissue sample was centrifuged at 300  $\times g$  for 10 min at 4°C. The pellet was used as the brain  
420 homogenate control. The supernatant was centrifuged at 2000  $\times g$  for 10 min at 4°C. The  
421 supernatant was centrifuged at 10,000  $\times g$  for 10 min at 4°C. The supernatant was transferred  
422 through a 0.22- $\mu$ m filter and ultracentrifuged at 100,000  $\times g$  for 70 minutes at 4°C using  
423 Beckman SW41Ti. The pellet was resuspended in 2 mL of 0.475M of sucrose in double-filtered  
424 PBS with 0.22- $\mu$ m filter (dfPBS) and overlaid on 5 sucrose cushions (2 mL each of 2.0M, 1.5M,  
425 1M, 0.825M, 0.65M in dfPBS) and ultracentrifuged at 100,000  $\times g$  for 20 h. The samples were  
426 fractionated in 1-mL step, and fractions V and VI are collected as EV-enriched fraction. Each  
427 fraction was ultracentrifuged at 100,000  $\times g$  for 70 minutes at 4°C to pellet EVs, which were  
428 resuspended in 30  $\mu$ L dfPBS as a final volume/fraction.

## 429 **Nanoparticle Track Analysis (NTA)**

430 The number of EVs in the enriched fraction was analyzed as previously described [52, 53].  
431 Briefly, all samples were diluted in dfPBS for at least 1:1000 or more to get particles within the  
432 target reading range for the Nanosight 300 machine (Malvern Panalytical Inc), which is 10-100  
433 particles per frame. Using a syringe pump infusion system (Harvard Laboratories/Malvern), five  
434 60-second videos were taken for each sample at 21°C constant. Analysis of particle counts was

435 carried out in the Nanosight NTA 3.3 software (Malvern Panalytical Inc) with a detection  
436 threshold of 5. Particle counts were normalized for dilution on the machine, dilution of the final  
437 pellet, and starting material for exosome extraction. The average count was then taken for  
438 fractions V and VI.

#### 439 **Atomic force microscopy (AFM)**

440 Ten  $\mu\text{L}$  of EVs ( $\sim 1 \mu\text{g}/\mu\text{L}$ ) were incubated with 100  $\mu\text{L}$  0.5% sarkosyl (#61747-100ML, Sigma-  
441 Aldrich) for 30 min on ice in ultracentrifuge-compatible Beckman microcentrifuge tubes for  
442 solubilization of vesicles, and dPBS was added to 1.2mL. The sample was ultracentrifuged at  
443  $100,000 \times g$  for 70min at  $4^\circ\text{C}$ . The supernatant was removed but leaving 50  $\mu\text{L}$ , and dPBS was  
444 added to 1.2mL for second ultracentrifugation at  $100,000 \times g$  for 70 min at  $4^\circ\text{C}$ . The pellet was  
445 dissociated in 10  $\mu\text{L}$  dPBS, and subjected to AFM imaging by ScanAsyst mode with Multimode  
446 8 AFM machine (Bruker, Billerica MA) as previously described [63].

#### 447 **Transmission Electron microscopy (TEM)**

448 TEM of EVs was conducted as previously described [4, 53]. Briefly, 5  $\mu\text{L}$  of the EV sample was  
449 adsorbed for 1 min to a carbon-coated grid (# CF400-CU, Electron Microscopy Sciences) that  
450 had been made hydrophilic by a 20-sec exposure to a glow discharge (25mA). Excess liquid was  
451 removed with a filter paper (#1 Whatman), the grid was then floated briefly on a drop of water  
452 (to wash away phosphate or salt), blotted on a filter paper, and then stained with 0.75% uranyl  
453 formate (#22451 EMS) for 15 seconds. After removing the excess uranyl formate with a filter  
454 paper, the grids were examined in a JEOL 1200EX Transmission electron microscope and  
455 images were recorded with an AMT 2k CCD camera.

#### 456 **ELISA of brain tissue extraction and EV samples**

457 Brain tissue homogenate and EV samples were diluted 1:10 in 8M guanidine buffer so  
458 solubilization, followed by dilution in TENT buffer (50 mM Tris HCl pH 7.5, 2 mM EDTA,  
459 150mM NaCl, 1% Triton X-100) supplemented with phosphatase inhibitors (Pierce HALT  
460 inhibitor), and subjected to human total tau ELISA (human tau: # KHB0042, Thermo Fisher  
461 Scientific) according to manufacturer's instructions.

#### 462 **EV labelling with PKH26**

463 EVs were labelled with lipophilic red fluorescent dye (PKH26, Sigma-Aldrich), according to the  
464 manufacturer's protocol. Briefly, 0.32- $\mu$ L PKH26 dye was mixed with 10  $\mu$ L EV samples in 40  
465  $\mu$ L diluent C, and incubated for 5 min at room temperature. dfPBS was used as a negative  
466 control. The labelling reaction was stopped by adding 50  $\mu$ L chilled dfPBS, and subjected to  
467 Exosome Spin Columns (MW 3000, ThermoFisher, cat.4484449) at  $750 \times g$  for 2 min to remove  
468 the free dye and enrich the labelled EVs, which was adjusted to 5  $\mu$ g/100  $\mu$ L for the neuronal EV  
469 uptake assay.

#### 470 **Primary tissue culture of murine cortical neurons**

471 Primary murine cortical neurons were isolated from E16 embryos from pregnant CD-1 mice  
472 (Charles River Laboratory). Dissociated cortical tissues were digested with trypsin-EDTA  
473 (diluted to 0.125%, #25200072, Invitrogen), triturated by polished pipettes, and strained into  
474 single neurons using a 40- $\mu$ m pore size Falcon cell strainer (Thermo Fisher Scientific), and  
475 plated onto 12-mm #1 thickness coverslips or plates, precoated with 100  $\mu$ g/mL poly-D-lysine  
476 (Sigma-Aldrich) diluted in borate buffer (0.05 M boric acid, pH 8.5) and washed with sterile  
477 water prior, at 375,000 cells per coverslip in 24-well plates. Neurons at DIV7 were treated with  
478 PKH26-labeled EVs for EV uptake or tau transfer study.

#### 479 **Tau seeding assay**

480 HEK-TauRD P301S FRET cells were plated at in 96-well PDL coated plate (# 354461, Corning)  
481 in growth media (DMEM, 10%FBS). The day after, human brain-derived EVs were mixed with  
482 80  $\mu$ L Opti-MEM and 20  $\mu$ L Lipofectamine 2000, and incubated at room temperature for 10 min.  
483 Subsequently, growth media was removed from the cells, replaced with samples containing  
484 Lipofectamine, and incubated at 37°C, 5%CO<sub>2</sub>. After 1 h, Lipofectamine-containing media was  
485 removed from the cells and replaced with growth media. Cells were maintained in culture at  
486 37°C, 5% CO<sub>2</sub> for 72 h afterward. The day of the analysis, cells were washed in PBS, detached  
487 with Trypsin 0.25% (#25200072, Invitrogen) and washed with FACS buffer (PBS + 0.5% BSA).  
488 Subsequently, cells were fixed in 2%PFA, 2% Sucrose for 15 min at 4 °C, spun at 12,000 rpm for  
489 15 min at 4 °C, resuspended in FACS buffer and acquired with a 5 lasers system LSRII (Becton  
490 Dickinson), using pacific-orange and pacific-blue dyes for YFP and CFP, respectively. Data was  
491 analyzed by FlowJo and expressed as Integrated FRET Density.

#### 492 **Stereotaxic surgery**

493 B6 mice at 18–19 months old were deeply anesthetized with isoflurane and immobilized in a  
494 stereotaxic frame (David Kopf Instruments) installed with robot stereotaxic injection system  
495 (Neurostar). Animals were unilaterally inoculated with human brain-derived EVs or tau  
496 aggregates in the dorsal hippocampal OML (bregma: -2.18 mm; lateral: 1.13 mm; depth: -1.9  
497 mm from the skull) using a 10- $\mu$ L Hamilton syringe as previously described [4]. Each injection  
498 site received 1.0  $\mu$ L of inoculum, containing 300 pg tau / $\mu$ L for EV samples, and 300 pg or 2  $\mu$ g  
499 of tau per  $\mu$ L oligomeric and fibril fractions.. We noted that majority of the injected materials  
500 were deposited at the OML of the hippocampus (Fig. 3A).

#### 501 **Immunochemistry and Immunofluorescence**

502 Brains were removed after transcardial perfusion fixation with ice-cold 4%  
503 paraformaldehyde/PBS followed by post-fixation for 16h and cryoprotection with 15% then 30%  
504 sucrose/PBS over 3-5 days. They were cut coronally in 20- $\mu$ m thickness using a cryostat, and  
505 three hippocampal sections separated at least 200  $\mu$ m per mouse per antibody were used for IHC.  
506 The sections were processed by antigen retrieval with Tris-EDTA (pH 8.0) at 80°C,  
507 permeabilized in 0.5% Triton-X 100/PBS, and blocked in 10% normal goat serum, 1% BSA, and  
508 0.1% tween-20 in PBS. Sections were incubated GAD67 (#PA5-36054, ThermoFisher  
509 scientific); GAD67-biotin-conjugated (# MAB5406B, Millipore), AT8 (# MN1020,  
510 ThermoFisher scientific), GluR2/3 (# AB1506, Millipore), MAP-2 (# mab3418, Millipore sigma),  
511 c-fos (# 226 003, Synaptic Systems), PS422 (# 44-764G, ThermoFisher scientific), Alz50 and  
512 MC1, CP13, PHF-1 (as kind gifts provided by Dr. Davis Peter), diluted with 1% BSA, 0.025%  
513 tween-20 in PBS at 4°C for overnight (see Supplementary Table S3 for antibody information).  
514 Sections were then washed and incubated in secondary antibodies (AlexaFluor 647 goat anti-  
515 mouse; 1:1000, AlexaFluor488 goat anti-rabbit; 1:1000, AlexaFluor568 streptavidin 1:1000) for  
516 1 h at room temperature. All images were captured on Nikon deconvolution wide-field  
517 epifluorescence system (Nikon Instruments) or confocal microscopic imaging as described below.

### 518 **Confocal image processing and quantification by Imaris**

519 All confocal imaging was performed on a LSM710 using Zen 2010 software (Zeiss) or a Leica  
520 TCS SP8 lightning microscope at the inverted Leica DMI8 microscope stand using the confocal  
521 mode with a 63 $\times$  oil immersion/1.4 N.A objective using a 1.1 optical zoom at a pinhole of 1.0  
522 Airy units. Images of 2048  $\times$  2048 pixels as confocal stacks with a z-interval of 0.28  $\mu$ m system  
523 optimized was used to image cells. For imaging GAD67 puncta, a 552-nm laser line was used  
524 and emission was collected at 565–650 nm; for imaging c-fos, a 488-nm laser line was used and

525 emission was collected at 490-600 nm. Gain and off-set were set at values which prevented  
526 saturated and empty pixels. After image acquisition, all images were applied with lightning  
527 deconvolution. The quantification of GAD67 positive puncta was counted by using the “spot”  
528 module of Imaris 9.5, 64-bit version (Bitplane AG, Saint Paul, MN, [www.bitplane.com](http://www.bitplane.com)). Manual  
529 cutting of the CA1 pyramidal cells with GAD67 fields in 3D. This program analyzes stacks of  
530 confocal sections acquired in two channels (red for GAD67, blue for DAPI represents cell  
531 number). Final data analysis was performed using Microsoft Excel and Graph rendering was  
532 done in GraphPad Prism

### 533 **Biochemical sequential extraction from mouse brains**

534 Brain tissues were removed from CTRL EV, pAD EV and AD EV-injected mice at the  
535 designated time points after transcardial perfusion of animals by ice-cold PBS to minimize  
536 contamination of blood-derived mouse immunoglobulins. Hippocampal and cortical regions  
537 were dissected separately, snap frozen in dry ice and stored at  $-80^{\circ}\text{C}$  before protein extraction.  
538 For enrichment of tau oligomers and fibrils, sequential extractions were performed as follows:  
539 Each hippocampal tissue was homogenized in 9 volumes of TBS buffer (50 mM Tris-Cl, pH 8.0  
540 in saline) supplemented with protease and phosphatase inhibitor cocktails (# PI78443, Thermo  
541 Fisher Scientific). The homogenate was centrifuged at  $48,300 \times g$  for 20 min at  $4^{\circ}\text{C}$ . The  
542 supernatant and pellet are designated as S1 (TBS-supernatant) and P1 (TBS-pellet) fraction,  
543 respectively. The S1 fraction was ultracentrifuged at  $186,340 \times g$  at  $4^{\circ}\text{C}$  for 40 min. The pellet  
544 fraction (S1p) was resuspended in a 4 volume of double-filtered TE buffer relative to the starting  
545 weight of the tissue, aliquoted and frozen at  $-80^{\circ}\text{C}$  as tau oligomer-enriched fraction. The P1  
546 fraction was resuspended in 5 volume of wet weight of the original tissue of buffer B (1%  
547 sarkosyl, 10 mM Tris, pH 7.4, 800 mM NaCl, 10% sucrose, 1 mM EGTA, 1 mM PMSF, all from



548 Sigma-Aldrich) and incubated by rotating with the bench top thermomixer at 37 °C for 1 h. The  
549 sample was ultracentrifuged at  $186,340 \times g$  for 1 h at 4 °C. After completely removing the  
550 supernatant and rinsing the pellet in sterile PBS, sarkosyl-insoluble pellet (P3) was resuspended  
551 with 50  $\mu$ L double-filtered TE buffer (10 mM Tris, 1 mM EDTA, pH 8.0), aliquoted and frozen  
552 at -80°C as tau fibril-enriched fraction.

### 553 **Western and dot blotting**

554 For western blotting, homogenates (Ho) of hippocampus from each experimental group and an  
555 equal proportion of corresponding Ho, S1, S1p and P3, were loaded on 10% SDS–PAGE gels (  
556 Bio-Rad) and electro-transferred to 0.45- $\mu$ m nitrocellulose membranes (Bio-Rad). For dot  
557 blotting, an equal volume of EVs sample were dotted onto 0.45- $\mu$ m nitrocellulose membranes  
558 (Bio-Rad) and washed twice with TBS buffer. The nitrocellulose membranes were then blocked  
559 in freshly prepared 5% skim milk diluted in TBS before being immunoblotted with specific  
560 primary antibodies (Supplementary Table 3). The membrane was further incubated with HRP-  
561 labeled secondary antibodies and scanned using C300 digital chemiluminescent imager (Azure  
562 Biosystems). The optical densities were measured using Image J software.

### 563 **Whole-cell patch clamp recording**

#### 564 *Preparation of Brain Slices for Recording and Filling*

565 Immediately after decapitation, mouse brains were rapidly removed and placed in oxygenated  
566 (95% O<sub>2</sub> and 5% CO<sub>2</sub>) ice-cold Ringer's solution containing following ingredients (in mM): 25  
567 NaHCO<sub>3</sub>, 124 NaCl, 1 KCl, 2 KH<sub>2</sub>PO<sub>4</sub>, 10 glucose, 2.5 CaCl<sub>2</sub>, 1.3 MgCl<sub>2</sub> (pH 7.4; Sigma-  
568 Aldrich). A total of four to five 300- $\mu$ m thick acute coronal sections containing the hippocampus  
569 were obtained from each subject. Over an 8-10 h period, slices were individually transferred  
570 from the incubation chamber to submersion-type recording chambers (Harvard Apparatus,

571 Holliston, MA) affixed to the stages of Nikon E600 infrared-differential interference contrast  
572 (IR-DIC) microscopes (Micro Video Instruments, Avon, MA) with a water-immersion lens (40×,  
573 0.9 NA; Olympus) for recording. During recordings, slices were superfused in room-temperature  
574 Ringer's solution bubbled with carbogen (95% O<sub>2</sub>, 5% CO<sub>2</sub>) a rate of 2.5 ml/min. Whole-cell  
575 patch clamp recordings were obtained from the soma of visually identified CA1 pyramidal cells  
576 in both the dorsal and ventral hippocampus of ipsilateral side of the brain. Electrodes were  
577 created from borosilicate glass with a Flaming and Brown micropipette puller (Model P-87,  
578 Sutter Instruments). These pulled patch pipettes were filled with potassium methanesulfonate  
579 (KMS) based intracellular solution, with concentrations in mM as follows: (KCH<sub>3</sub>SO<sub>3</sub> 122,  
580 MgCl<sub>2</sub> 2, EGTA 5, Na-HEPES 10, Na<sub>2</sub>ATP 5), and had a resistance of 5.5–6.5 MΩ in external  
581 Ringer's solution.

#### 582 *Physiological Inclusion Criteria*

583 Single AP properties (including threshold, amplitude, Action potential Half-Width (APHW), rise  
584 and fall) were measured on the second evoked AP in a 200 ms current-clamp series that  
585 preferentially evoked 3 or more action potentials after depolarizing step-current. We proceeded  
586 to High R<sub>n</sub> or Low R<sub>n</sub> only if neurons were unable to elicit AP at 200 ms. AP half-width was  
587 computed at half-max of AP amplitude, where the amplitude was measured from the threshold to  
588 the absolute peak of the spike. All the quantification for AP properties was carried out in an  
589 expanded timescale, and the linear measure tool we used in FitMaster analysis software (HEKA  
590 Elektronik) to measure all single AP properties. An algorithm designed in Matlab was used to  
591 automatically detect these parameters. In the few cases where it failed to do so, a manual  
592 detection method was used. The final paradigm in the Current-clamp configuration was to inject  
593 2 s hyperpolarizing and depolarizing steps (-100 to +120 pA with increments of 20 pA or -220

594 pA to +330 pA with increments of 50pA, 12.5kHz sampling frequency) to assess repetitive AP  
595 firing. Those neurons which did not fire repetitively in depolarizing step were discarded. Firing  
596 rates in response to current steps were analyzed fitting with a generalized linear model, using the  
597 genotype, CA1 pyramidal cells types, rheobase, input resistance, injected current level and their  
598 respective interactions as independent variables. Whole-cell voltage clamp was used to measure  
599 AMPA receptor-mediated spontaneous excitatory currents (sEPSCs) response for 2 min at a  
600 holding potential of -80 mV (6.67 kHz sampling frequency). The same neuron was held at -40  
601 mV (6.67 kHz sampling frequency) for 2 min to obtain enough sample size to measure GABA  
602 receptor-mediated spontaneous inhibitory currents (sIPSCs). All recorded traces were run  
603 through Minianalysis software (Synaptosoft) which allowed for quantification of synaptic current  
604 properties such as frequency, amplitude, area, time to rise and time to decay. To determine the  
605 kinetics of EPSCs and IPSCs, the rise and decay of averaged traces were each fit to a single-  
606 exponential function. In all of the synaptic current measurements, the event detection threshold  
607 was set at the maximum root mean squared noise level (5 pA). All neurons had resting  
608 membrane potentials between -55 and -75 mV (somatic recordings) and were confirmed to have  
609 intact somas and apical tufts.

## 610 **Statistical Analyses**

611 All data are presented as means  $\pm$  standard error of the mean (s.e.m). Comparisons between two  
612 groups were done by two-tailed paired or unpaired Student's *t*-tests. Multiple comparisons were  
613 performed by either one- or two-way ANOVA, followed by Turkey's or Bonferroni's *post hoc*.  
614 Statistical analyses were performed using Prism 8.0 (GraphPad Software). A statistically  
615 significant difference was assumed at  $p < 0.05$ .

616

617 **Acknowledgement:** We would like to thank JC Delpech, A DeLeo, and other members of the  
618 Laboratory of Molecular NeuroTherapeutics for scientific suggestions and technical assistance,  
619 and Dr. Peter Davies for the generous gift of the Alz50, MC1, CP13 and PHF1 monoclonal  
620 antibodies.

621

622 **Funding:** This work was funded in part by NIH R01AG066429 (TI), RF1AG054199 (TI), NIH  
623 R01AG054672 (TI), NIH R56AG057469 (TI), NIH R21NS104609 (TI), Alzheimer's  
624 Association AARF-9550302678 (SM), Cure Alzheimer's Fund (TI), BrightFocus Foundation  
625 (A2016551S), CurePSP (TI) and BU ADC NIH P30AG0138423 (ZR, SI).

626

627 **Author contributions:** Conceptualization, Z.R., A.M.D., S.I., J.L. and T.I.; Methodology, Z.R.,  
628 D.P., A.Y-K., S.M., S-V.K., K.T-K., S.G., R.K., H.E.G., Y.W., J.L.; Bioinformatics: J.H.; Image  
629 analysis, Z.R, J.H, A.Y-K., S-V.K., YW; Manuscript writing & Editing, Z.R., D.P., T.I., S.I.; All  
630 authors read and approved the final manuscript.

631

632 **Conflict of Interest:**

633 The authors declare no conflict of interest in this manuscript

634

635 **Figure legends**

636 **Figure 1. Characterization of EVs by TEM, nanoparticle tracking analysis, tau oligomer**  
637 **dot-blotting and atomic force microscopy**

638 **a.** A schema of EV separation from human frozen brain tissue.

639 **b.** TEM image of human brain-derived EVs.

640 **c-e.** Nanoparticles tracking analysis (NTA) of isolated EVs (C), quantification of EV size (D)  
641 and EV density (E).

642 **f-k.** Semi-quantification of tau oligomers in EVs by multiple tau oligomer antibodies. Dot blot  
643 images shown in Supplementary Fig. 1. \* $p < 0.05$ , \*\* $p < 0.01$ , as determined by one-way  
644 ANOVA (alpha = 0.05) and Turkey's *post-hoc*. Graphs indicate mean  $\pm$  s.e.m. Each dot  
645 represents individual subject, 3 replicates per subject, 3 subjects per group.

646 **l-m.** Atomic force microscopy (AFM) images showing brain-derived EV-tau oligomers isolated  
647 from CTRL, pAD, and AD brains (L), scale bars = 200 nm. Size distribution histogram of EV-  
648 tau oligomers (M). \* $p < 0.05$ , \*\* $p < 0.01$ , \*\*\* $p < 0.005$  and \*\*\*\* $p < 0.0001$  for pAD EVs vs.  
649 CTRL EVs; # $p < 0.05$ , ## $p < 0.01$ , and ##### $p < 0.0001$  for AD EVs vs. CTRL EVs as determined  
650 by one-way ANOVA (alpha = 0.05) and Turkey's *post-hoc*. Graphs indicate mean  $\pm$  s.e.m. n=3  
651 images per sample.

652

653 **Figure 2. Neuronal uptake, tau transfer efficiency and tau seeding activities of human**  
654 **brain-derived EVs**

655 **a.** A diagram illustrating the primary culture model with primary neurons employed to measure  
656 the transfer of EVs containing tau and a biosensor cell assay system for seeding activity.

657 **b.** Cellular uptake of PKH26-labeled EVs (red) by primary culture murine cortical neurons  
658 (MAP-2, green; DAPI, blue). Original magnification: 20 $\times$  (left and middle columns); 40 $\times$  (right  
659 column, taken by Zeiss LSM710 confocal microscopy). Scale bars = 40, 20, 10  $\mu$ m (left to right).

660 **c.** Quantification of PKH26 fluorescent intensity in MAP-2<sup>+</sup> neurons. \*\* $p < 0.0001$  and \*\*\*\* $p <$   
661 0.0001 compared with PBS or Dye only group; ## $p < 0.01$  compared with CTRL-EV group;  
662 determined by one-way ANOVA (alpha = 0.05) and Turkey's *post-hoc*. Each dot represents

663 average data per cell in one image (10-20 cells per image), 30 images per group (for PBS and  
664 dye only), 10 images per donor and three donors per group (for CTRL-EV, pAD-EV and AD  
665 EVs), total N = 30 per group.

666 **d.** Total human tau ELISA of neuronal cell lysates. <sup>#</sup>*p* < 0.05 compared with pAD-EV and <sup>##</sup>*p* <  
667 0.01 compared with CTRL-EV group; *n.s* denotes no significance as determined by one-way  
668 ANOVA (alpha = 0.05) and Turkey's *post-hoc*. Three donors per group, three independent  
669 experiments. Graphs indicate mean ± s.e.m.

670 **e.** EVs were tested in the Tau-FRET assay for tau seeding activity. Results are plotted as  
671 integrated FRET Density values for each sample. <sup>###</sup>*p* < 0.001 compared with CTRL-EV and  
672 pAD-EV group; as determined by one-way ANOVA (alpha = 0.05) and Turkey's *post-hoc*.  
673 Three donors per group, and each dot represents one well. Graphs indicate mean ± s.e.m. **b-e:**  
674 Three donors per group, and the data is representative of three independent experiments.

675

676 **Figure 3. AD-EV but not CTRL-EV injection causes progressive tauopathy in aged B6**  
677 **mouse brains.**

678 **a.** A schema illustrating 300 pg of tau containing EVs from human brain unilaterally injected to  
679 the hippocampus of B6 mice at 18-19 months of age. DiI (red) indicated the injection site of  
680 outer molecular layer of hippocampus.

681 **b.** Representative image of AT8 staining (red) 4.5 months after intrahippocampal injection of  
682 AD EV and pAD EV into aged B6 mouse brain. Original magnification: 20×, Scale bar = 50 μm.

683 **c.** Semiquantitative analysis of AD-like tau pathologies based on AT8 immunostaining of brains  
684 from CTRL-EV, pAD-EV and AD-EV-injected mice at 4.5 months post injection. Blue dots  
685 represent AT8<sup>+</sup> perikaryal inclusions. AT8<sup>+</sup> density from green (0, low) to red (3, high).

686 **d.** Quantification of AT8+ occupied area in the contralateral (blue) and ipsilateral (red) in entire  
687 hippocampal regions of recipient mice. \* $p < 0.05$  and \*\* $p < 0.01$  compared with CTRL-EV group  
688 determined by one-way ANOVA ( $\alpha = 0.05$ ) and Turkey's *post-hoc*. Total mice in each group  
689 for the quantification are 4, 6, 12, 12, 11 for saline, Tau-KO, CTRL, pAD and AD. Two donors  
690 for EVs per group for CTRL, pAD and AD ( $n = 5-6$  mice per donor). Bregma -1.34 to -3.64, 4  
691 sections per mouse were analyzed. Each dot represents mean value from one animal. Graphs  
692 indicate mean  $\pm$  s.e.m. **e.** Immunoblotting of biochemically fractionated brain tissue samples for  
693 homogenate (Ho), TBS supernatant (S1), tau oligomer enriched (S1p) and tau fibril enriched  
694 fractions (P3) by Tau-5 (total tau) and PHF1 (pSer396/pSer404 tau) (top panels) and their  
695 quantification (bottom panels). Equal proportions of Ho, S1, Sp1 and P3 fractions were analyzed  
696 ( $n = 3$  mice / group). Optical density (OD) was normalized to that for the homogenate fraction  
697 from each corresponding mouse. \* $p < 0.05$  and \*\* $p < 0.01$  compared with CTRL group as  
698 determined by one-way ANOVA ( $\alpha = 0.05$ ) and Turkey's *post-hoc*. Graphs indicate mean  $\pm$   
699 s.e.m.

700

701 **Figure 4. EV-tau but not oligomeric or fibril tau enriched samples derived from the same**  
702 **AD brain induced tau propagation in mouse brain**

703 **a.** AFM images of EVs and tau aggregates isolated from the same AD brain tissues. Scale bars =  
704 200 nm

705 **b.** Representative images of PHF1 immunoblotting of isolated EVs, tau oligos and tau fibrils by  
706 PHF1 antibodies.

707 **c.** Representative images of AT8 immunostained recipient mice after unilateral injection of AD  
708 EVs (left), tau oligomer-enriched fraction (middle) and tau fibril-enriched fraction (right) in

709 cortical region (top panels) and dentate gyrus (bottom panels). Scale bars = 200  $\mu\text{m}$  (top), 50  
710  $\mu\text{m}$ (bottom).

711 **d.** Quantification of AT8<sup>+</sup> neurons in the hippocampus of recipient mice. \*\*\*\*  $p < 0.0001$   
712 compared between EV-tau injected group and oligomeric or fibril tau group, as determined by  
713 one-way ANOVA (alpha = 0.05) and Turkey's post-hoc. EV-tau, oligomeric and fibril tau group:  
714  $n = 5-6$  mice per group for quantification. Bregma -1.34 to -3.64, 4 sections per mouse were  
715 analyzed. Each dot represents mean value per animal. Graphs indicate mean  $\pm$  s.e.m.

716

717 **Figure 5 Specific pathological tau staining with AT8 antibody in GABAergic interneurons**  
718 **in the hippocampus of B6 mice**

719 **a.** AT8 (red) and GAD67 (green) immunostaining in the ipsilateral dentate gyrus of hippocampal  
720 region from Tau KO EV, CTRL EV, pAD EV and AD EV injected mice at 4.5 months post  
721 injection. Scale bars = 100  $\mu\text{m}$ .

722 **b.** AT8 (red) and GAD67 (green) immunostaining in the ipsilateral CA1 and CA3 of  
723 hippocampal region from AD EV injected mice. Scale bars = 20  $\mu\text{m}$ (top), 25  $\mu\text{m}$  (bottom).

724 **c-e.** Quantification of GAD67<sup>+</sup> cells in DG (c), CA1 (d) and CA3 of hippocampus (e). The  
725 percentage of AT8<sup>+</sup> GAD67<sup>+</sup> cells in all GAD67<sup>+</sup> cells are shown in the right column (c-e).  
726 Ipsilateral side (red column) contralateral side (blue column) \*  $p < 0.05$ , \*\*  $p < 0.01$  and \*\*\*  $p <$   
727  $0.001$  compared with CTRL group, as determined by one-way ANOVA (alpha = 0.05) and  
728 Turkey's *post-hoc*.  $n = 5-6$  mice per group for quantification. At least two sections were imaged  
729 per animal. Each dot represents mean value per animal. Graphs indicate mean  $\pm$  s.e.m.

730 **f-g.** Immunostaining of GluR2/3<sup>+</sup> mossy cells (f) and AT8 in the ipsilateral dentate gyrus of  
731 hippocampal region from AD-EV injected mice; and quantification of the ratio of GAD67<sup>+</sup> AT8<sup>+</sup>



732 cells / total AT8<sup>+</sup> cells (blue) and GluR2/3<sup>+</sup> AT8<sup>+</sup> cells / AT8<sup>+</sup> cells (red) (g). n = 6 mice per  
733 group for quantification. At least two sections were imaged per animal. Each dot represents mean  
734 value per animal. Graphs indicate mean  $\pm$  s.e.m. Scale bars = 20  $\mu$ m(top), 10  $\mu$ m(bottom).

735

736 **Figure 6. Reduction in c-fos expression in GAD67<sup>+</sup> GABAergic neurons and GAD67<sup>+</sup>**  
737 **puncta around CA1 pyramidal cells in AD EV and pAD EV injected aged B6 mice**

738 **a-b.** GAD67 (red) and c-fos (green) co-staining images (a) and quantification of the percentage  
739 of c-fos<sup>+</sup> GAD67<sup>+</sup> cells in all GAD67<sup>+</sup> cells (b) in CA1 region. Scale bar=10  $\mu$ m.

740 **c-d.** GAD67 (red) and c-fos (green) co-staining images (c) and quantification of the percentage  
741 of c-fos<sup>+</sup> GAD67<sup>+</sup> cells in all GAD67<sup>+</sup> cells (d) in DG region. Scale bar=50  $\mu$ m. \*  $p < 0.05$  AD-

742 EVs compared with Tau-KO EV group, as determined by one-way ANOVA (alpha = 0.05) and

743 Turkey's *post-hoc*. n = 6 mice per group for quantification. At least two sections were imaged

744 per animal. Each dot represents mean value per animal. Graphs indicate mean  $\pm$  s.e.m.

745 **e.** High-magnification images in top panels compared GAD67 expression (red) in CA1

746 pyramidal cells of hippocampus all four injected Tau-KO-, CTRL-, pAD- or AD EV groups.

747 Scale bar=10  $\mu$ m. Second panel shows lower-magnification images of GAD67 expression and

748 DAPI staining. Scale bar=20  $\mu$ m. Third panel shows cells counted by Imaris software based on

749 DAPI staining.

750 Fourth panel shows GAD67+ puncta analysis by Imaris. Scale bar: 10  $\mu$ m.

751 **f-g.** Quantification of GAD67<sup>+</sup> puncta (f) and total cell number in CA1 of hippocampus (g). \*  $p <$

752 0.05 and \*\*  $p < 0.01$  pAD-EV compared with Tau-KO and CTRL-EV group, as determined by

753 one-way ANOVA (alpha = 0.05) and Dunnett's *post-hoc*. n = 5-6 mice per group for

754 quantification. At least two sections were imaged per animal. Each dot represents mean value per  
755 animal. Graphs indicate mean  $\pm$  s.e.m.

756

757 **Figure 7. whole-cell current clamp recording of CA1 pyramidal neurons**

758 **a.** Confocal z stack montage (63 $\times$  magnification) image of biocytin-filled mouse CA1 pyramidal  
759 neurons after recording.

760 **b-g:** Action potential (AP)-firing recorded in whole-cell current clamp mode; **b:** Representative  
761 traces for Tau KO (black color), pAD (blue color), and AD-EV (red color) for 100 pA steps at 2  
762 s long High Rn protocol. **c.** Quantification of repetitive firing at High-Rn step current injection  
763 protocol. \*\*  $p < 0.01$  vs. Tau KO-EV group as determined by RM-ANOVA; **d:** pAD-EV

764 significantly reduce the firing at 100 pA; **e:** Quantification of repetitive firing at Low-Rn step  
765 current injection protocol. \*  $p < 0.05$  vs. Tau KO-EV group as determined by RM-ANOVA; **f:**

766 pAD-EV significantly reduced the firing rate at and + 130 pA of step current; **g.** AD-EV

767 significantly reduced AP amplitude. **c-g:**  $n = 30, 50,$  and  $57$  cells for Tau KO, pAD and AD-

768 injected mice, 5-7 mice per group. Each dot represents one recorded cell. Graphs indicate mean  $\pm$   
769 s.e.m.

770 **h-i:** Quantification of GABAergic spontaneous inhibitory postsynaptic currents (sIPSCs)

771 recorded in whole-cell voltage clamp mode from neuronal network. pAD showed significant

772 decrease in sIPSC amplitude (**h**) and E-I amplitude ratio (**i**). \*  $p < 0.05$  compared with CTRL

773 group, as determined by one-way ANOVA ( $\alpha = 0.05$ ) and Dunnett's *post-hoc*. H-I:  $n = 18,$

774  $23,$  and  $28$  cells for Tau KO, pAD and AD-injected mice, 5-7 mice per group. Each dot

775 represents one recorded cell. Graphs indicate mean  $\pm$  s.e.m. See also Supplementary Tables S4-

776 S7.

777

778 **Supplementary Figure S1. Dot blot of Tau KO and human brain-derived EV samples by**  
779 **tau oligomer-specific antibodies.**

780

781 **Supplementary Figure S2. AT8 staining of young and aged mice after the injection of**  
782 **human brain-derived EVs.** Young (2 months old) or Aged (18 months old) mice were  
783 stereotaxically injected with human brain-derived EVs (CTRL, pAD or AD) containing 300 pg  
784 tau in 1  $\mu$ L volume into the outer molecular layer of dentate gyrus, and sacrificed 4.5 months  
785 after the injection for the neuropathological examination using AT8 (pSer202/pSer205 tau)  
786 monoclonal (red) and counterstained with Dapi (blue). Coronal sections depicting the ipsilateral  
787 hippocampal region (left) and hilus region (right). Sale bars: 200  $\mu$ m (left) and 50  $\mu$ m (right)

788

789 **Supplementary Figure S3. Tau pathology staining with Alz50, MC1, CP13, PS422 and**  
790 **PHF1 antibodies.** Representative images of AT8 (pSer202/pSer205 tau, A), Alz50  
791 (conformation-specific misfolded tau, B), MC1 (conformation-specific misfolded tau, C), CP13  
792 (pSer202 tau, D), PS422 (pSer422 tau, E) and PHF1 staining (pSer396/pSer404 tau, F) (red) and  
793 Dapi (blue) 4.5 months after intrahippocampal injection of saline, Tau KO EV, CTRL EV, and  
794 pAD EV or AD EV (1  $\mu$ L volume containing 300 pg tau) into aged B6 mouse brain. Scale bar =  
795 200 (left) and 100 $\mu$ m (right).

796

797 **Supplementary Figure S4. Tau accumulation in the injection site of cortex 4.5 months post**  
798 **intracranial injection.** Aged mice (18 months of age) were intracranially injected with AD EV  
799 (left), tau oligomer-enriched fraction (middle) or tau fibril-enriched fraction (right) containing

800 300 pg tau in 1  $\mu$ L volume. The animals were sacrificed and tested for neuropathology using  
801 AT8 (red) and counterstained by Dapi (blue) for nuclear staining. Perikaryal accumulation of p-  
802 tau in AD EV-injected cortical region (left) and neuropil staining in tau oligomer (middle) or  
803 fibril-injected cortical region (right). Scale bar=50  $\mu$ m.

804

805 **Supplementary Figure S5. Injection of 300pg of EV-tau, 2  $\mu$ g of oligomeric or fibril tau**  
806 **derived from AD brain induced tau propagation in mouse brain**

807 **a.** Representative images of AT8 immunostained recipient mice after unilateral injection of 300  
808 pg of AD EVs (left), 2  $\mu$ g of tau oligomer-enriched fraction (middle) and tau fibril-enriched  
809 fraction (right) in cortical region (top panels, scale bar=200  $\mu$ m) and dentate gyrus (bottom  
810 panels, scale bar=50  $\mu$ m).

811 **b.** Quantification of AT8<sup>+</sup> neurons in the hippocampus of recipient mice. *n.s* denotes no  
812 significance as determined by one-way ANOVA ( $\alpha = 0.05$ ) and Turkey's *post-hoc*. EV-tau,  
813 oligomeric and fibril tau group:  $n = 3-6$  mice per group for quantification. Bregma -1.34 to -3.64,  
814 4 sections per mouse were analyzed. Each dot represents mean value per animal. Graphs indicate  
815 mean  $\pm$  s.e.m.

816 **c.** Representative images of PHF1 immunoblotting of the same injected amount of isolated EVs,  
817 tau oligos and tau fibrils by PHF1 antibodies.

818

819 **Supplementary Figure S6. AT8<sup>+</sup> cell was co-stained with parvalbumin<sup>+</sup> inhibitory but not**  
820 **neurogranin<sup>+</sup> excitatory neurons in the hippocampal region after AD EV injection.**

821 **a.** AT8 (pSer202/pSer205 tau, red) and parvalbumin (inhibitory neuronal marker, green)

822 immunostaining in the ipsilateral CA1, CA3 and DG regions of hippocampus from AD EV

823 injected mice at 4.5 months post injection. Nuclei were counterstained by Dapi (blue). Scale bar=  
824 50  $\mu$ m.

825 **b.** AT8 (red) and neurogranin (excitatory neuronal marker, green) immunostaining of the same  
826 brains. Nuclei were counterstained by Dapi (blue). Scale bar= 50  $\mu$ m.

827

### 828 **Supplementary Table S1. Demographics of human cases used in the study**

829

### 830 **Supplementary Table S2. Biochemical characterization of EV-enriched fractions derived** 831 **from human brain**

832

### 833 **Supplementary Table S3. List of antibodies used in the study**

834

### 835 **Supplementary Table S4-S8. Electrophysiological properties of CA1 pyramidal cells in** 836 **brain-derived EV-injected mouse brain**

837

### 838 **References**

- 839 1 Apicco DJ, Ash PEA, Maziuk B, LeBlang C, Medalla M, Al Abdullatif A, Ferragud A,  
840 Botelho E, Ballance HI, Dhawan U et al (2018) Reducing the RNA binding protein TIA1  
841 protects against tau-mediated neurodegeneration in vivo. *Nat Neurosci* 21: 72-80 Doi  
842 10.1038/s41593-017-0022-z
- 843 2 Arai H, Terajima M, Miura M, Higuchi S, Muramatsu T, Machida N, Seiki H, Takase S,  
844 Clark CM, Lee VM et al (1995) Tau in cerebrospinal fluid: a potential diagnostic marker  
845 in Alzheimer's disease. *Ann Neurol* 38: 649-652 Doi 10.1002/ana.410380414
- 846 3 Arriagada PV, Growdon JH, Hedley-Whyte ET, Hyman BT (1992) Neurofibrillary  
847 tangles but not senile plaques parallel duration and severity of Alzheimer's disease.  
848 *Neurology* 42: 631-639
- 849 4 Asai H, Ikezu S, Tsunoda S, Medalla M, Luebke J, Haydar T, Wolozin B, Butovsky O,  
850 Kugler S, Ikezu T (2015) Depletion of microglia and inhibition of exosome synthesis halt  
851 tau propagation. *Nat Neurosci* 18: 1584-1593 Doi 10.1038/nn.4132

- 852 5 Baker S, Polanco JC, Gotz J (2016) Extracellular Vesicles Containing P301L Mutant Tau  
853 Accelerate Pathological Tau Phosphorylation and Oligomer Formation but Do Not Seed  
854 Mature Neurofibrillary Tangles in ALZ17 Mice. *J Alzheimers Dis* 54: 1207-1217 Doi  
855 10.3233/JAD-160371
- 856 6 Bareggi SR, Franceschi M, Bonini L, Zecca L, Smirne S (1982) Decreased CSF  
857 concentrations of homovanillic acid and gamma-aminobutyric acid in Alzheimer's  
858 disease. Age- or disease-related modifications? *Arch Neurol* 39: 709-712 Doi  
859 10.1001/archneur.1982.00510230035010
- 860 7 Barres C, Blanc L, Bette-Bobillo P, Andre S, Mamoun R, Gabius HJ, Vidal M (2010)  
861 Galectin-5 is bound onto the surface of rat reticulocyte exosomes and modulates vesicle  
862 uptake by macrophages. *Blood* 115: 696-705 Doi 10.1182/blood-2009-07-231449
- 863 8 Bilousova T, Elias C, Miyoshi E, Alam MP, Zhu C, Campagna J, Vadivel K, Jagodzinska  
864 B, Gyls KH, John V (2018) Suppression of tau propagation using an inhibitor that  
865 targets the DK-switch of nSMase2. *Biochem Biophys Res Commun* 499: 751-757 Doi  
866 10.1016/j.bbrc.2018.03.209
- 867 9 Braak H, Braak E (1991) Neuropathological staging of Alzheimer-related changes. *Acta*  
868 *Neuropathol* 82: 239-259
- 869 10 Brunello CA, Merezhko M, Uronen RL, Huttunen HJ (2019) Mechanisms of secretion  
870 and spreading of pathological tau protein. *Cell Mol Life Sci*: Doi 10.1007/s00018-019-  
871 03349-1
- 872 11 Budnik V, Ruiz-Cañada C, Wendler F (2016) Extracellular vesicles round off  
873 communication in the nervous system. *Nat Rev Neurosci* 17: 160-172 Doi  
874 10.1038/nrn.2015.29
- 875 12 Caraiscos VB, Elliott EM, You-Ten KE, Cheng VY, Belelli D, Newell JG, Jackson MF,  
876 Lambert JJ, Rosahl TW, Wafford KA et al (2004) Tonic inhibition in mouse hippocampal  
877 CA1 pyramidal neurons is mediated by alpha5 subunit-containing gamma-aminobutyric  
878 acid type A receptors. *Proc Natl Acad Sci U S A* 101: 3662-3667 Doi  
879 10.1073/pnas.0307231101
- 880 13 Chan-Palay V (1987) Somatostatin immunoreactive neurons in the human hippocampus  
881 and cortex shown by immunogold/silver intensification on vibratome sections:  
882 coexistence with neuropeptide Y neurons, and effects in Alzheimer-type dementia. *J*  
883 *Comp Neurol* 260: 201-223 Doi 10.1002/cne.902600205
- 884 14 Cheng L, Doecke JD, Sharples RA, Villemagne VL, Fowler CJ, Rembach A, Martins  
885 RN, Rowe CC, Macaulay SL, Masters CL et al (2015) Prognostic serum miRNA  
886 biomarkers associated with Alzheimer's disease shows concordance with  
887 neuropsychological and neuroimaging assessment. *Mol Psychiatry* 20: 1188-1196 Doi  
888 10.1038/mp.2014.127
- 889 15 Christianson HC, Svensson KJ, van Kuppevelt TH, Li JP, Belting M (2013) Cancer cell  
890 exosomes depend on cell-surface heparan sulfate proteoglycans for their internalization  
891 and functional activity. *Proc Natl Acad Sci U S A* 110: 17380-17385 Doi  
892 10.1073/pnas.1304266110
- 893 16 Colin M, Dujardin S, Schraen-Maschke S, Meno-Tetang G, Duyckaerts C, Courade JP,  
894 Buee L (2020) From the prion-like propagation hypothesis to therapeutic strategies of  
895 anti-tau immunotherapy. *Acta Neuropathol* 139: 3-25 Doi 10.1007/s00401-019-02087-9
- 896 17 Combs B, Tiernan CT, Hamel C, Kanaan NM (2017) Production of recombinant tau  
897 oligomers in vitro. *Methods Cell Biol* 141: 45-64 Doi 10.1016/bs.mcb.2017.06.005

- 898 18 Danzer KM, Kranich LR, Ruf WP, Cagsal-Getkin O, Winslow AR, Zhu L, Vanderburg  
899 CR, McLean PJ (2012) Exosomal cell-to-cell transmission of alpha synuclein oligomers.  
900 *Mol Neurodegener* 7: 42 Doi 10.1186/1750-1326-7-42
- 901 19 Davies P, Katzman R, Terry RD (1980) Reduced somatostatin-like immunoreactivity in  
902 cerebral cortex from cases of Alzheimer disease and Alzheimer senile dementia. *Nature*  
903 288: 279-280 Doi 10.1038/288279a0
- 904 20 Deepa SS, Carulli D, Galtrey C, Rhodes K, Fukuda J, Mikami T, Sugahara K, Fawcett  
905 JW (2006) Composition of perineuronal net extracellular matrix in rat brain: a different  
906 disaccharide composition for the net-associated proteoglycans. *J Biol Chem* 281: 17789-  
907 17800 Doi 10.1074/jbc.M600544200
- 908 21 DeLeo AM, Ikezu T (2018) Extracellular Vesicle Biology in Alzheimer's Disease and  
909 Related Tauopathy. *J Neuroimmune Pharmacol* 13: 292-308 Doi 10.1007/s11481-017-  
910 9768-z
- 911 22 Delpech JC, Herron S, Botros MB, Ikezu T (2019) Neuroimmune Crosstalk through  
912 Extracellular Vesicles in Health and Disease. *Trends Neurosci* 42: 361-372 Doi  
913 10.1016/j.tins.2019.02.007
- 914 23 Dujardin S, Bégard S, Caillierez R, Lachaud C, Delattre L, Carrier S, Loyens A, Galas  
915 MC, Bousset L, Melki Ret al (2014) Ectosomes: a new mechanism for non-exosomal  
916 secretion of tau protein. *PLoS One* 9: e100760 Doi 10.1371/journal.pone.0100760
- 917 24 Evans LD, Wassmer T, Fraser G, Smith J, Perkinton M, Billinton A, Livesey FJ (2018)  
918 Extracellular Monomeric and Aggregated Tau Efficiently Enter Human Neurons through  
919 Overlapping but Distinct Pathways. *Cell reports* 22: 3612-3624 Doi  
920 10.1016/j.celrep.2018.03.021
- 921 25 Falcon B, Zhang W, Murzin AG, Murshudov G, Garringer HJ, Vidal R, Crowther RA,  
922 Ghetti B, Scheres SHW, Goedert M (2018) Structures of filaments from Pick's disease  
923 reveal a novel tau protein fold. *Nature* 561: 137-140 Doi 10.1038/s41586-018-0454-y
- 924 26 Falcon B, Zivanov J, Zhang W, Murzin AG, Garringer HJ, Vidal R, Crowther RA,  
925 Newell KL, Ghetti B, Goedert Met al (2019) Novel tau filament fold in chronic traumatic  
926 encephalopathy encloses hydrophobic molecules. *Nature* 568: 420-423 Doi  
927 10.1038/s41586-019-1026-5
- 928 27 Fevrier B, Vilette D, Archer F, Loew D, Faigle W, Vidal M, Laude H, Raposo G (2004)  
929 Cells release prions in association with exosomes. *Proc Natl Acad Sci U S A* 101: 9683-  
930 9688 Doi 10.1073/pnas.0308413101
- 931 28 Fiandaca MS, Kapogiannis D, Mapstone M, Boxer A, Eitan E, Schwartz JB, Abner EL,  
932 Petersen RC, Federoff HJ, Miller BL et al (2015) Identification of preclinical Alzheimer's  
933 disease by a profile of pathogenic proteins in neurally derived blood exosomes: A case-  
934 control study. *Alzheimers Dement* 11: 600-607 e601 Doi 10.1016/j.jalz.2014.06.008
- 935 29 Fitzpatrick AWP, Falcon B, He S, Murzin AG, Murshudov G, Garringer HJ, Crowther  
936 RA, Ghetti B, Goedert M, Scheres SHW (2017) Cryo-EM structures of tau filaments  
937 from Alzheimer's disease. *Nature* 547: 185-190 Doi 10.1038/nature23002
- 938 30 Ghag G, Bhatt N, Cantu DV, Guerrero-Munoz MJ, Ellsworth A, Sengupta U, Kaye R  
939 (2018) Soluble tau aggregates, not large fibrils, are the toxic species that display seeding  
940 and cross-seeding behavior. *Protein Sci* 27: 1901-1909 Doi 10.1002/pro.3499
- 941 31 Govindpani K, Calvo-Flores Guzman B, Vinnakota C, Waldvogel HJ, Faull RL,  
942 Kwakowsky A (2017) Towards a Better Understanding of GABAergic Remodeling in  
943 Alzheimer's Disease. *Int J Mol Sci* 18: Doi 10.3390/ijms18081813

- 944 32 Grad LI, Fernando SM, Cashman NR (2015) From molecule to molecule and cell to cell:  
945 prion-like mechanisms in amyotrophic lateral sclerosis. *Neurobiol Dis* 77: 257-265 Doi  
946 10.1016/j.nbd.2015.02.009
- 947 33 Guo JL, Narasimhan S, Changolkar L, He Z, Stieber A, Zhang B, Gathagan RJ, Iba M,  
948 McBride JD, Trojanowski JQ et al (2016) Unique pathological tau conformers from  
949 Alzheimer's brains transmit tau pathology in nontransgenic mice. *J Exp Med* 213: 2635-  
950 2654 Doi 10.1084/jem.20160833
- 951 34 Hatch RJ, Wei Y, Xia D, Gotz J (2017) Hyperphosphorylated tau causes reduced  
952 hippocampal CA1 excitability by relocating the axon initial segment. *Acta*  
953 *Neuropathologica* 133: 717-730 Doi 10.1007/s00401-017-1674-1
- 954 35 He B, Liu L, Cook GA, Grgurevich S, Jennings LK, Zhang XA (2005) Tetraspanin CD82  
955 attenuates cellular morphogenesis through down-regulating integrin alpha6-mediated cell  
956 adhesion. *J Biol Chem* 280: 3346-3354 Doi 10.1074/jbc.M406680200
- 957 36 Holmes BB, Furman JL, Mahan TE, Yamasaki TR, Mirbaha H, Eades WC, Belaygorod  
958 L, Cairns NJ, Holtzman DM, Diamond MI (2014) Proteopathic tau seeding predicts  
959 tauopathy in vivo. *Proc Natl Acad Sci U S A* 111: E4376-4385 Doi  
960 10.1073/pnas.1411649111
- 961 37 Hoshino A, Costa-Silva B, Shen TL, Rodrigues G, Hashimoto A, Tesic Mark M, Molina  
962 H, Kohsaka S, Di Giannatale A, Ceder Set al (2015) Tumour exosome integrins  
963 determine organotropic metastasis. *Nature* 527: 329-335 Doi 10.1038/nature15756
- 964 38 Hu W, Zhang X, Tung YC, Xie S, Liu F, Iqbal K (2016) Hyperphosphorylation  
965 determines both the spread and the morphology of tau pathology. *Alzheimers Dement* 12:  
966 1066-1077 Doi 10.1016/j.jalz.2016.01.014
- 967 39 Im H, Shao H, Park YI, Peterson VM, Castro CM, Weissleder R, Lee H (2014) Label-  
968 free detection and molecular profiling of exosomes with a nano-plasmonic sensor. *Nat*  
969 *Biotechnol* 32: 490-495 Doi 10.1038/nbt.2886
- 970 40 Jiang L, Ash PEA, Maziuk BF, Ballance HI, Boudeau S, Abdullatif AA, Orlando M,  
971 Petrucelli L, Ikezu T, Wolozin B (2019) TIA1 regulates the generation and response to  
972 toxic tau oligomers. *Acta Neuropathol* 137: 259-277 Doi 10.1007/s00401-018-1937-5
- 973 41 Kinney JW, Bemiller SM, Murtishaw AS, Leisgang AM, Salazar AM, Lamb BT (2018)  
974 Inflammation as a central mechanism in Alzheimer's disease. *Alzheimers Dement (N Y)*  
975 4: 575-590 Doi 10.1016/j.trci.2018.06.014
- 976 42 Krasemann S, Madore C, Cialic R, Baufeld C, Calcagno N, El Fatimy R, Beckers L,  
977 O'Loughlin E, Xu Y, Fanek Z et al (2017) The TREM2-APOE Pathway Drives the  
978 Transcriptional Phenotype of Dysfunctional Microglia in Neurodegenerative Diseases.  
979 *Immunity* 47: 566-581 e569 Doi 10.1016/j.immuni.2017.08.008
- 980 43 Lambert JC, Heath S, Even G, Champion D, Sleegers K, Hiltunen M, Combarros O,  
981 Zelenika D, Bullido MJ, Tavernier Bet al (2009) Genome-wide association study  
982 identifies variants at CLU and CR1 associated with Alzheimer's disease. *Nat Genet* 41:  
983 1094-1099 Doi 10.1038/ng.439
- 984 44 Lasagna-Reeves CA, Castillo-Carranza DL, Sengupta U, Guerrero-Munoz MJ, Kiritoshi  
985 T, Neugebauer V, Jackson GR, Kaye R (2012) Alzheimer brain-derived tau oligomers  
986 propagate pathology from endogenous tau. *Sci Rep* 2: 700 Doi 10.1038/srep00700
- 987 45 Levenga J, Krishnamurthy P, Rajamohamedsait H, Wong H, Franke TF, Cain P,  
988 Sigurdsson EM, Hoeffler CA (2013) Tau pathology induces loss of GABAergic



- 989 interneurons leading to altered synaptic plasticity and behavioral impairments. *Acta*  
990 *Neuropathol Commun* 1: 34 Doi 10.1186/2051-5960-1-34
- 991 46 Mathys H, Davila-Velderrain J, Peng Z, Gao F, Mohammadi S, Young JZ, Menon M, He  
992 L, Abdurrob F, Jiang X et al (2019) Single-cell transcriptomic analysis of Alzheimer's  
993 disease. *Nature* 570: 332-337 Doi 10.1038/s41586-019-1195-2
- 994 47 McAvoy KM, Rajamohamed Sait H, Marsh G, Peterson M, Reynolds TL, Gagnon J,  
995 Geisler S, Leach P, Roberts C, Cahir-McFarland E et al (2019) Cell-autonomous and non-  
996 cell autonomous effects of neuronal BIN1 loss in vivo. *PLoS One* 14: e0220125 Doi  
997 10.1371/journal.pone.0220125
- 998 48 Mirbaha H, Holmes BB, Sanders DW, Bieschke J, Diamond MI (2015) Tau Trimers Are  
999 the Minimal Propagation Unit Spontaneously Internalized to Seed Intracellular  
1000 Aggregation. *J Biol Chem* 290: 14893-14903 Doi 10.1074/jbc.M115.652693
- 1001 49 Morelli AE, Larregina AT, Shufesky WJ, Sullivan ML, Stolz DB, Papworth GD,  
1002 Zahorchak AF, Logar AJ, Wang Z, Watkins SC et al (2004) Endocytosis, intracellular  
1003 sorting, and processing of exosomes by dendritic cells. *Blood* 104: 3257-3266 Doi  
1004 10.1182/blood-2004-03-0824
- 1005 50 Mulcahy LA, Pink RC, Carter DR (2014) Routes and mechanisms of extracellular vesicle  
1006 uptake. *J Extracell Vesicles* 3: Doi 10.3402/jev.v3.24641
- 1007 51 Muraoka S, DeLeo A, Sethi M, Yukawa-Takamatsu Y, Yang Z, Ko J, Hogan J, Ruan Z,  
1008 You Y, Wang Y et al (2020) Proteomic Profiling and Biological Characterization of  
1009 Extracellular Vesicles Isolated from Alzheimer's Disease Brain Tissues. *Alzheimers*  
1010 *Dement* in press:
- 1011 52 Muraoka S, Jedrychowski MP, Tatebe H, DeLeo AM, Ikezu S, Tokuda T, Gygi SP, Stern  
1012 RA, Ikezu T (2019) Proteomic Profiling of Extracellular Vesicles Isolated From  
1013 Cerebrospinal Fluid of Former National Football League Players at Risk for Chronic  
1014 Traumatic Encephalopathy. *Front Neurosci* 13: 1059 Doi 10.3389/fnins.2019.01059
- 1015 53 Muraoka S, Lin W, Chen M, Hersh SW, Emili A, Xia W, Ikezu T (2020) Assessment of  
1016 separation methods for extracellular vesicles from human and mouse brain tissues and  
1017 human cerebrospinal fluids. *Methods*: Doi 10.1016/j.ymeth.2020.02.002
- 1018 54 Narasimhan S, Guo JL, Changolkar L, Stieber A, McBride JD, Silva LV, He Z, Zhang B,  
1019 Gathagan RJ, Trojanowski JQ et al (2017) Pathological Tau Strains from Human Brains  
1020 Recapitulate the Diversity of Tauopathies in Nontransgenic Mouse Brain. *J Neurosci* 37:  
1021 11406-11423 Doi 10.1523/JNEUROSCI.1230-17.2017
- 1022 55 Nazarenko I, Rana S, Baumann A, McAlear J, Hellwig A, Trendelenburg M, Lochnit G,  
1023 Preissner KT, Zoller M (2010) Cell surface tetraspanin Tspan8 contributes to molecular  
1024 pathways of exosome-induced endothelial cell activation. *Cancer Res* 70: 1668-1678 Doi  
1025 10.1158/0008-5472.CAN-09-2470
- 1026 56 Palop JJ, Mucke L (2009) Epilepsy and cognitive impairments in Alzheimer disease.  
1027 *Arch Neurol* 66: 435-440 Doi 10.1001/archneurol.2009.15
- 1028 57 Polanco JC, Scicluna BJ, Hill AF, Gotz J (2016) Extracellular vesicles isolated from  
1029 brains of rTg4510 mice seed tau aggregation in a threshold-dependent manner. *J Biol*  
1030 *Chem*: Doi 10.1074/jbc.M115.709485
- 1031 58 Purushothaman A, Bandari SK, Liu J, Mobley JA, Brown EE, Sanderson RD (2016)  
1032 Fibronectin on the Surface of Myeloma Cell-derived Exosomes Mediates Exosome-Cell  
1033 Interactions. *J Biol Chem* 291: 1652-1663 Doi 10.1074/jbc.M115.686295

- 1034 59 Quast T, Eppler F, Semmling V, Schild C, Homsy Y, Levy S, Lang T, Kurts C, Kolanus  
1035 W (2011) CD81 is essential for the formation of membrane protrusions and regulates  
1036 Rac1-activation in adhesion-dependent immune cell migration. *Blood* 118: 1818-1827  
1037 Doi 10.1182/blood-2010-12-326595
- 1038 60 Ruan Z, Ikezu T (2019) Tau Secretion. *Adv Exp Med Biol* 1184: 123-134 Doi  
1039 10.1007/978-981-32-9358-8\_11
- 1040 61 Saman S, Kim W, Raya M, Visnick Y, Miro S, Saman S, Jackson B, McKee AC, Alvarez  
1041 VE, Lee NC et al (2012) Exosome-associated tau is secreted in tauopathy models and is  
1042 selectively phosphorylated in cerebrospinal fluid in early Alzheimer disease. *J Biol Chem*  
1043 287: 3842-3849 Doi 10.1074/jbc.M111.277061
- 1044 62 Schoenberg MR, Rum RS, Osborn KE, Werz MA (2017) A randomized, double-blind,  
1045 placebo-controlled crossover study of the effects of levetiracetam on cognition, mood,  
1046 and balance in healthy older adults. *Epilepsia* 58: 1566-1574 Doi 10.1111/epi.13849
- 1047 63 Sengupta U, Carretero-Murillo M, Kaye R (2018) Preparation and Characterization of  
1048 Tau Oligomer Strains. *Methods Mol Biol* 1779: 113-146 Doi 10.1007/978-1-4939-7816-  
1049 8\_9
- 1050 64 Sigurdsson EM (2018) Tau Immunotherapies for Alzheimer's Disease and Related  
1051 Tauopathies: Progress and Potential Pitfalls. *J Alzheimers Dis* 66: 855-856 Doi  
1052 10.3233/JAD-189010
- 1053 65 Soler H, Dorca-Arevalo J, Gonzalez M, Rubio SE, Avila J, Soriano E, Pascual M (2017)  
1054 The GABAergic septohippocampal connection is impaired in a mouse model of  
1055 tauopathy. *Neurobiol Aging* 49: 40-51 Doi 10.1016/j.neurobiolaging.2016.09.006
- 1056 66 Stern RA, Tripodis Y, Baugh CM, Fritts NG, Martin BM, Chaisson C, Cantu RC, Joyce  
1057 JA, Shah S, Ikezu T et al (2016) Preliminary Study of Plasma Exosomal Tau as a  
1058 Potential Biomarker for Chronic Traumatic Encephalopathy. *J Alzheimers Dis*: Doi  
1059 10.3233/JAD-151028
- 1060 67 Sung BH, Ketova T, Hoshino D, Zijlstra A, Weaver AM (2015) Directional cell  
1061 movement through tissues is controlled by exosome secretion. *Nature communications* 6:  
1062 7164 Doi 10.1038/ncomms8164
- 1063 68 van Niel G, D'Angelo G, Raposo G (2018) Shedding light on the cell biology of  
1064 extracellular vesicles. *Nature reviews Molecular cell biology* 19: 213-228 Doi  
1065 10.1038/nrm.2017.125
- 1066 69 Volz F, Bock HH, Gierthmuehlen M, Zentner J, Haas CA, Freiman TM (2011)  
1067 Stereologic estimation of hippocampal GluR2/3- and calretinin-immunoreactive hilar  
1068 neurons (presumptive mossy cells) in two mouse models of temporal lobe epilepsy.  
1069 *Epilepsia* 52: 1579-1589 Doi 10.1111/j.1528-1167.2011.03086.x
- 1070 70 Vossel KA, Beagle AJ, Rabinovici GD, Shu H, Lee SE, Naasan G, Hegde M, Cornes SB,  
1071 Henry ML, Nelson AB et al (2013) Seizures and epileptiform activity in the early stages  
1072 of Alzheimer disease. *JAMA neurology* 70: 1158-1166 Doi  
1073 10.1001/jamaneurol.2013.136
- 1074 71 Winston CN, Aulston B, Rockenstein EM, Adame A, Prikhodko O, Dave KN, Mishra P,  
1075 Rissman RA, Yuan SH (2019) Neuronal Exosome-Derived Human Tau is Toxic to  
1076 Recipient Mouse Neurons in vivo. *J Alzheimers Dis* 67: 541-553 Doi 10.3233/JAD-  
1077 180776
- 1078 72 Winston CN, Goetzl EJ, Akers JC, Carter BS, Rockenstein EM, Galasko D, Masliah E,  
1079 Rissman RA (2016) Prediction of conversion from mild cognitive impairment to

1080 dementia with neuronally derived blood exosome protein profile. *Alzheimers Dement*  
1081 (Amst) 3: 63-72 Doi 10.1016/j.dadm.2016.04.001

1082 73 Yamada K, Holth JK, Liao F, Stewart FR, Mahan TE, Jiang H, Cirrito JR, Patel TK,  
1083 Hochgrafe K, Mandelkow EM et al (2014) Neuronal activity regulates extracellular tau in  
1084 vivo. *J Exp Med* 211: 387-393 Doi 10.1084/jem.20131685

1085 74 You Y, Borgmann K, Edara VV, Stacy S, Ghorpade A, Ikezu T (2020) Activated human  
1086 astrocyte-derived extracellular vesicles modulate neuronal uptake, differentiation and  
1087 firing. *J Extracell Vesicles* 9: 1706801 Doi 10.1080/20013078.2019.1706801

1088 75 You Y, Ikezu T (2019) Emerging roles of extracellular vesicles in neurodegenerative  
1089 disorders. *Neurobiol Dis* 130: 104512 Doi 10.1016/j.nbd.2019.104512

1090 76 Zetterberg H, Wilson D, Andreasson U, Minthon L, Blennow K, Randall J, Hansson O  
1091 (2013) Plasma tau levels in Alzheimer's disease. *Alzheimers Res Ther* 5: 9 Doi  
1092 10.1186/alzrt163

1093 77 Zhang W, Tarutani A, Newell KL, Murzin AG, Matsubara T, Falcon B, Vidal R,  
1094 Garringer HJ, Shi Y, Ikeuchi T et al (2020) Novel tau filament fold in corticobasal  
1095 degeneration. *Nature*: Doi 10.1038/s41586-020-2043-0

1096 78 Zimmer R, Teelken AW, Trieling WB, Weber W, Weihmayr T, Lauter H (1984)  
1097 Gamma-aminobutyric acid and homovanillic acid concentration in the CSF of patients  
1098 with senile dementia of Alzheimer's type. *Arch Neurol* 41: 602-604 Doi  
1099 10.1001/archneur.1984.04210080010005

1100

Figure 1

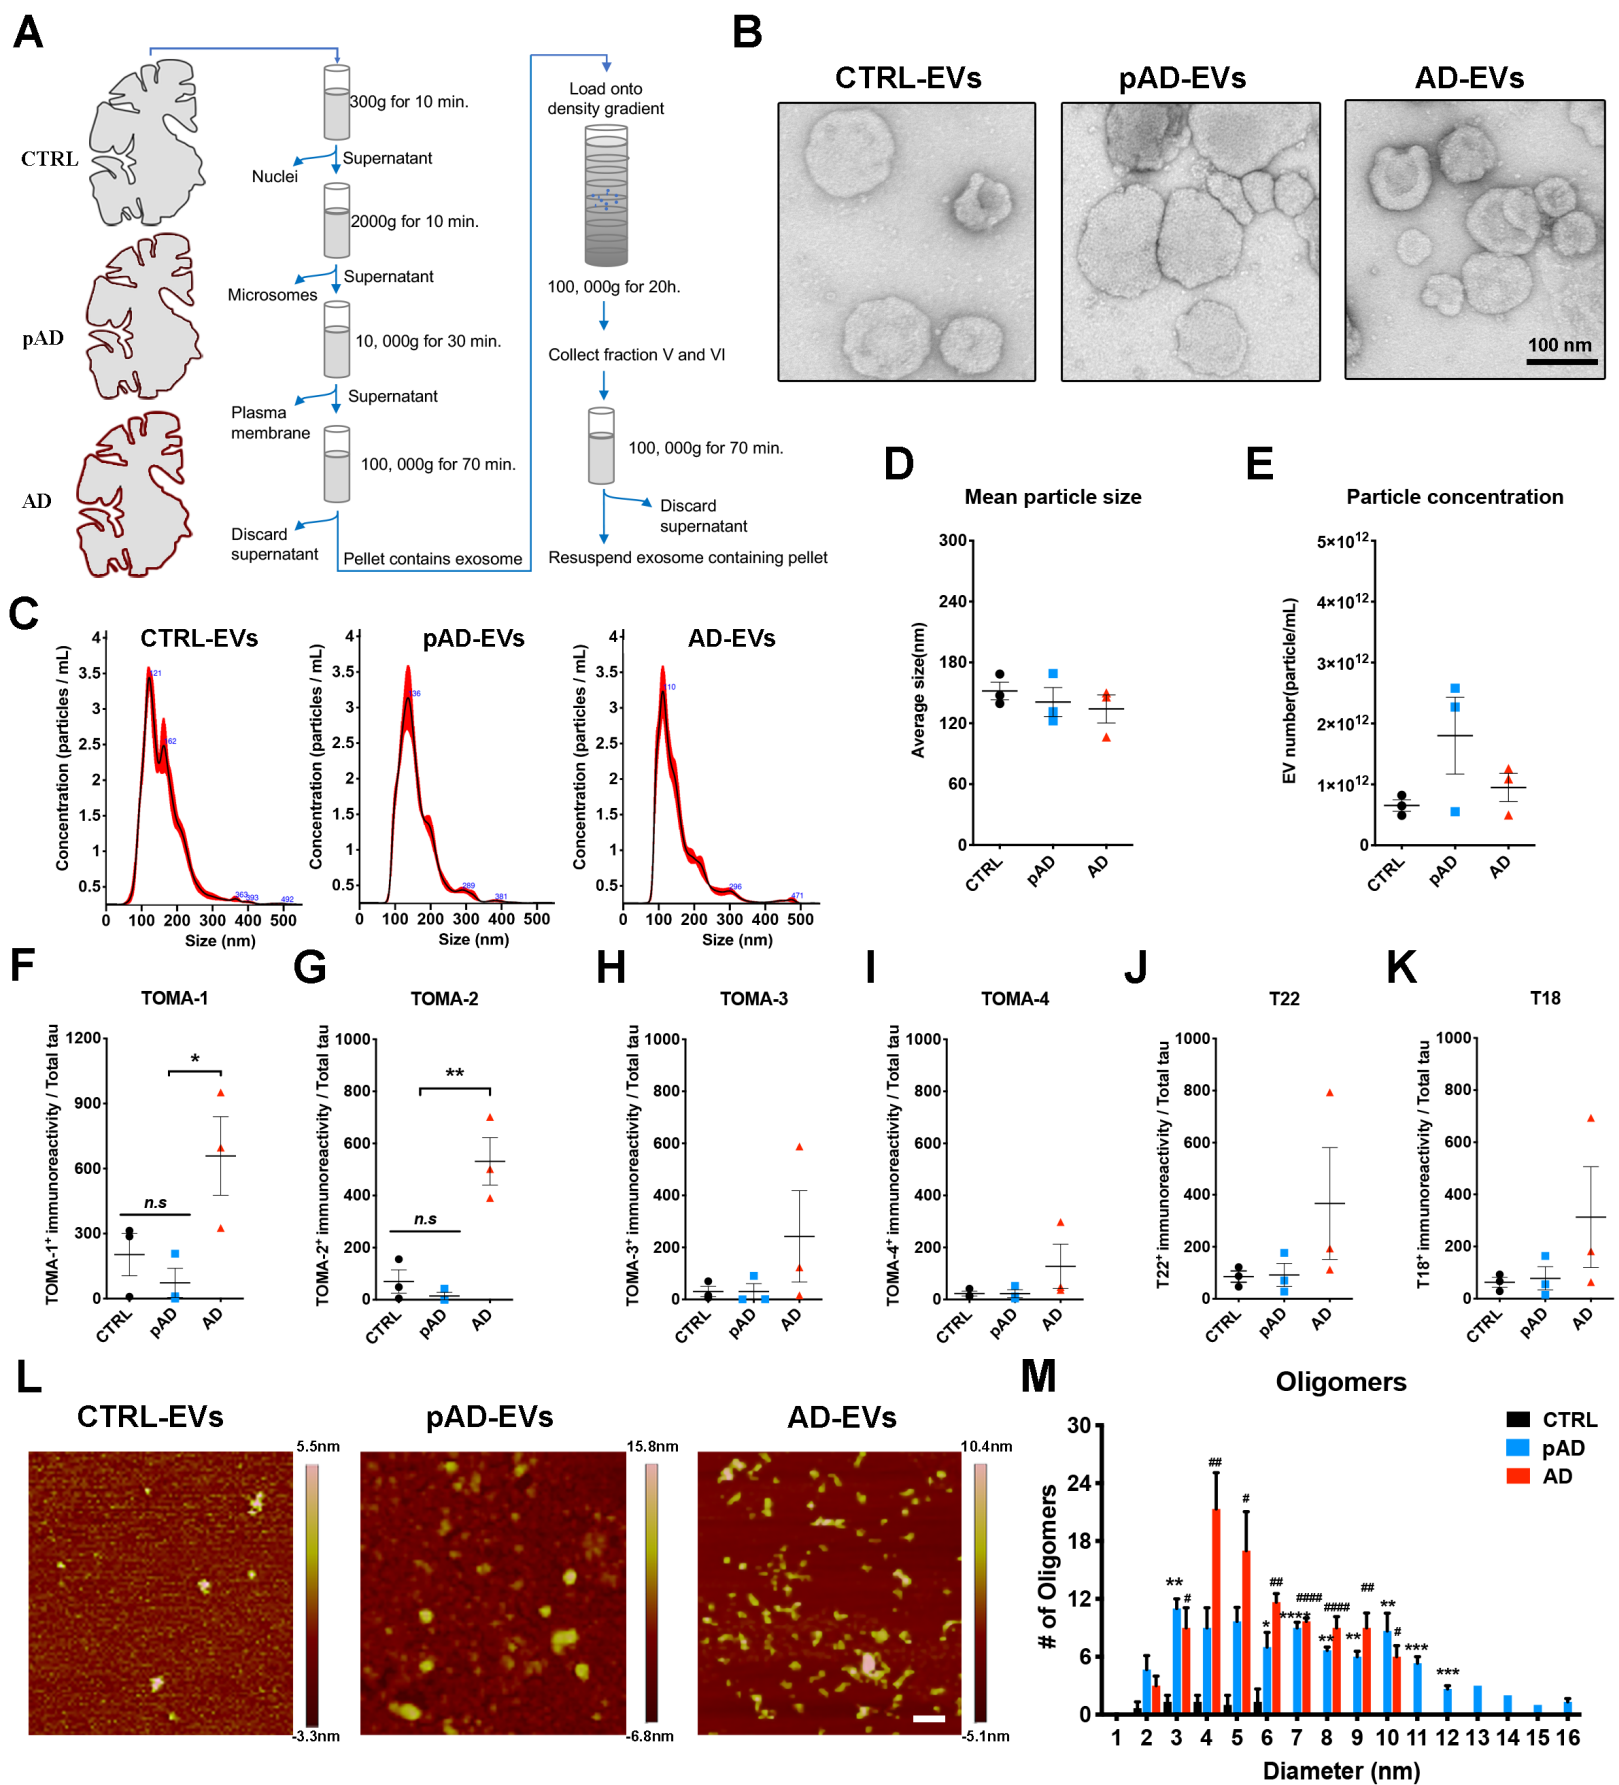

Figure 2

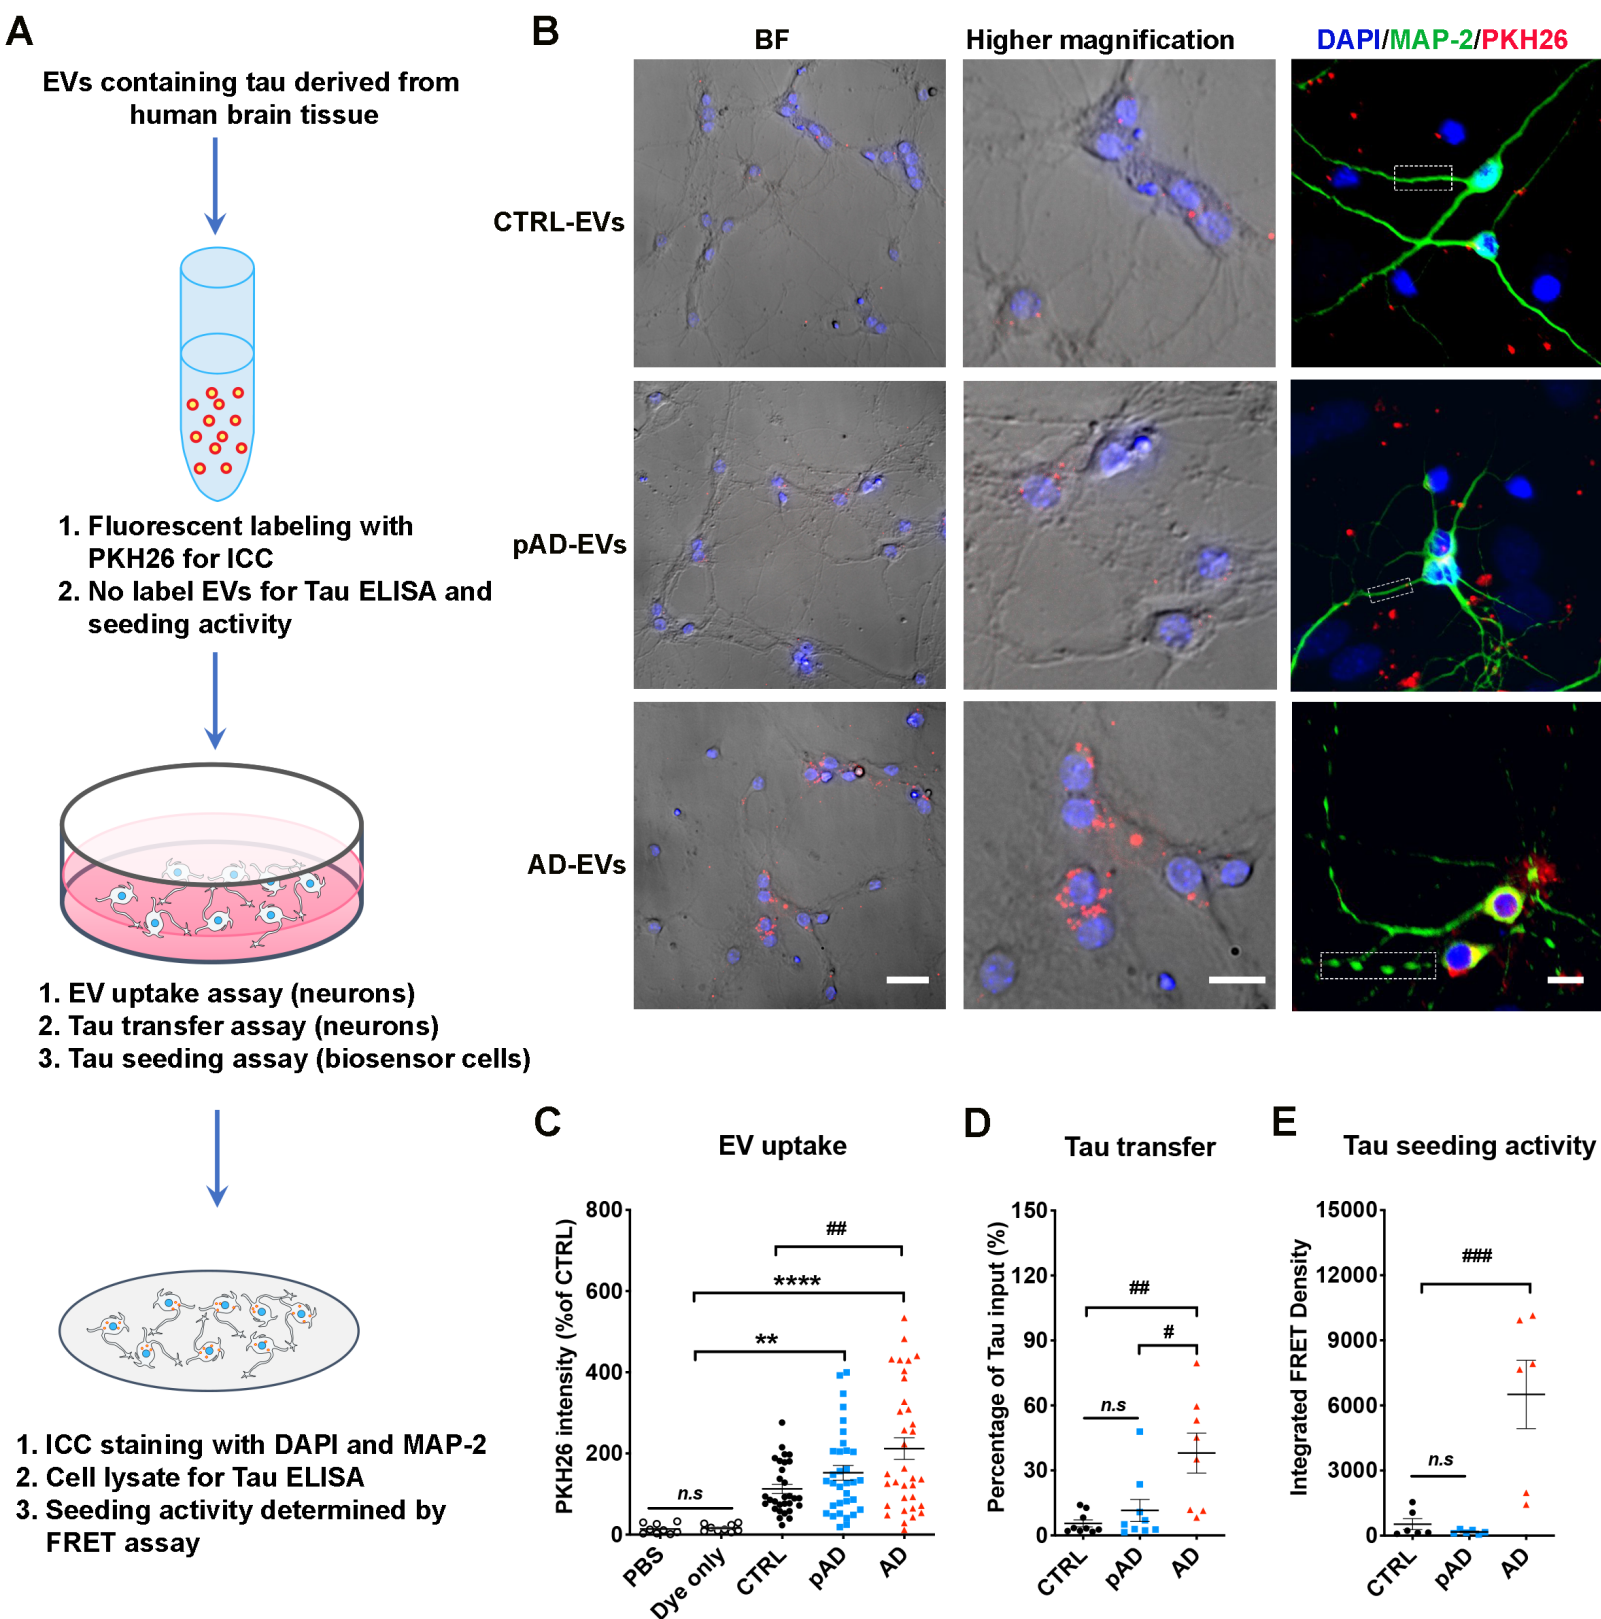

Figure 3

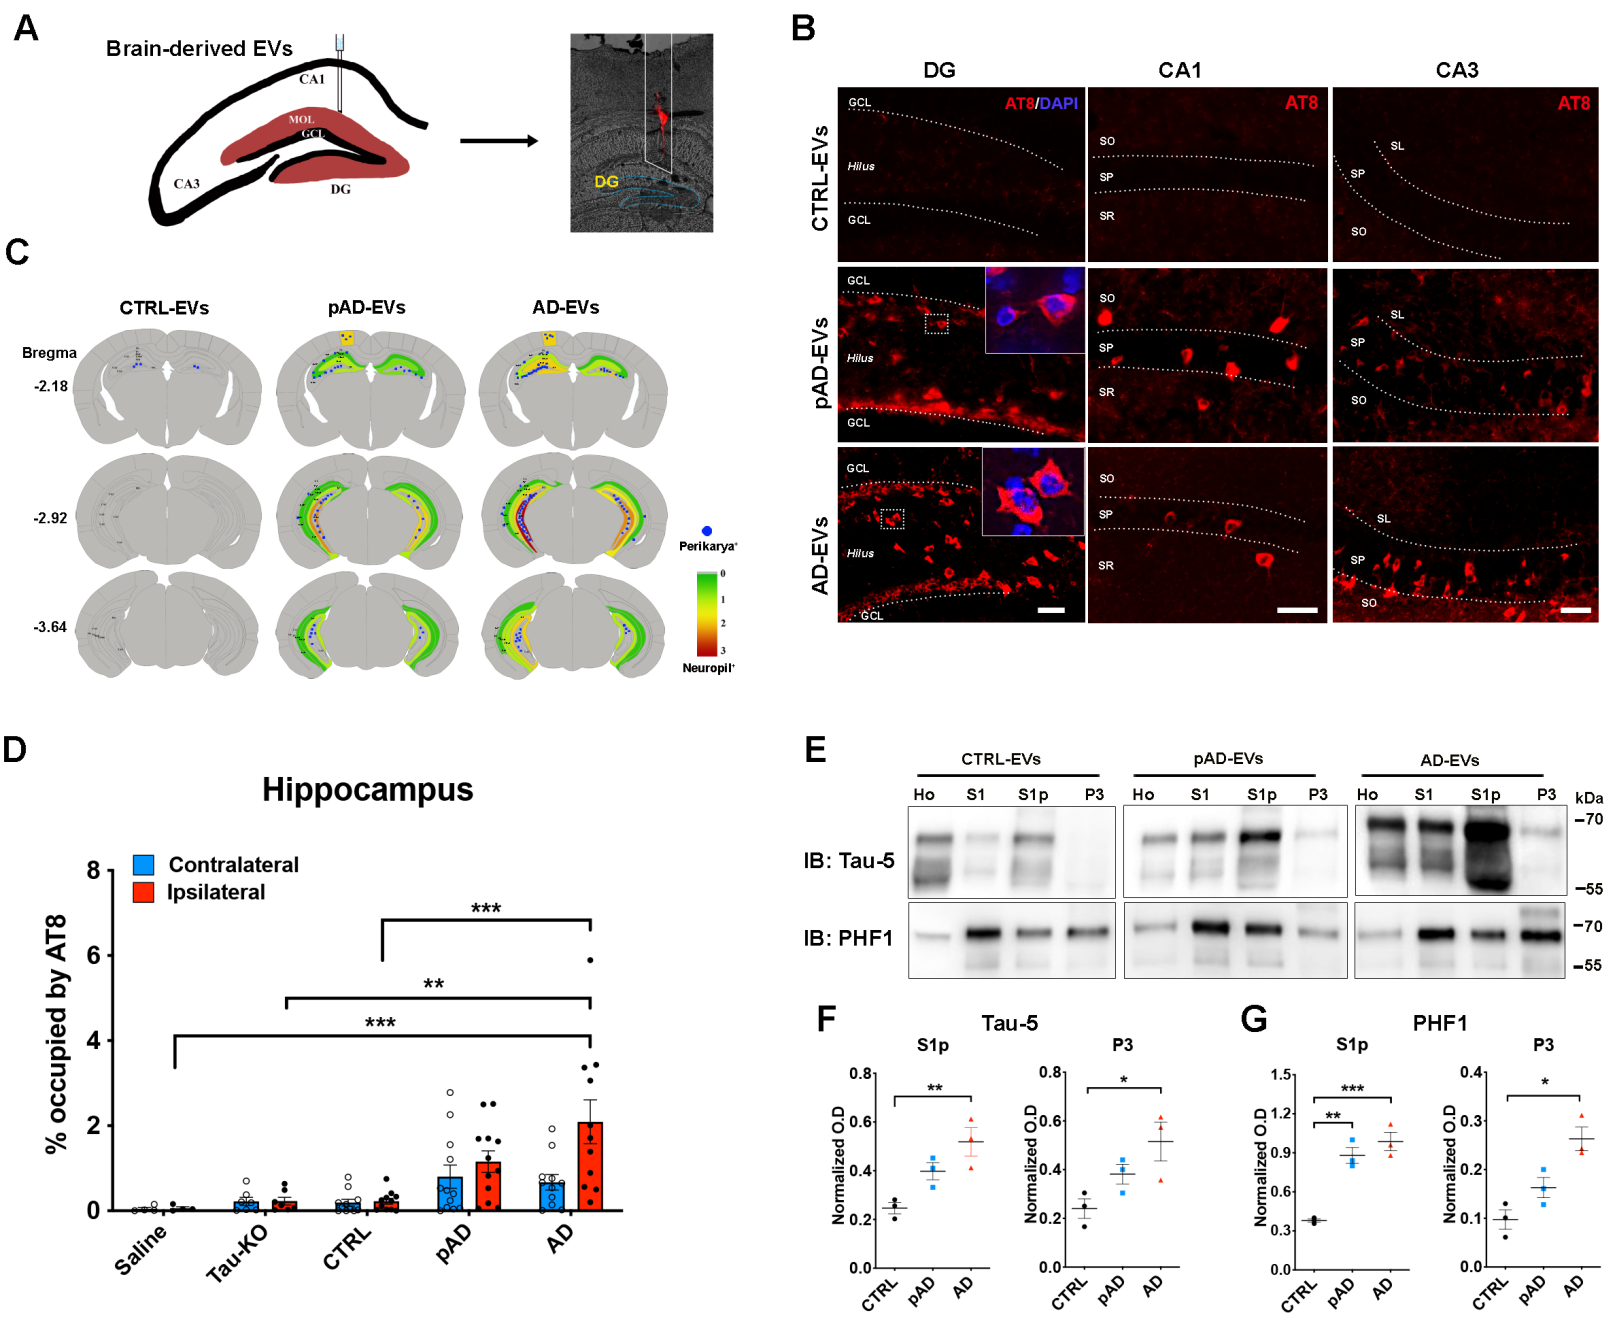

Figure 4

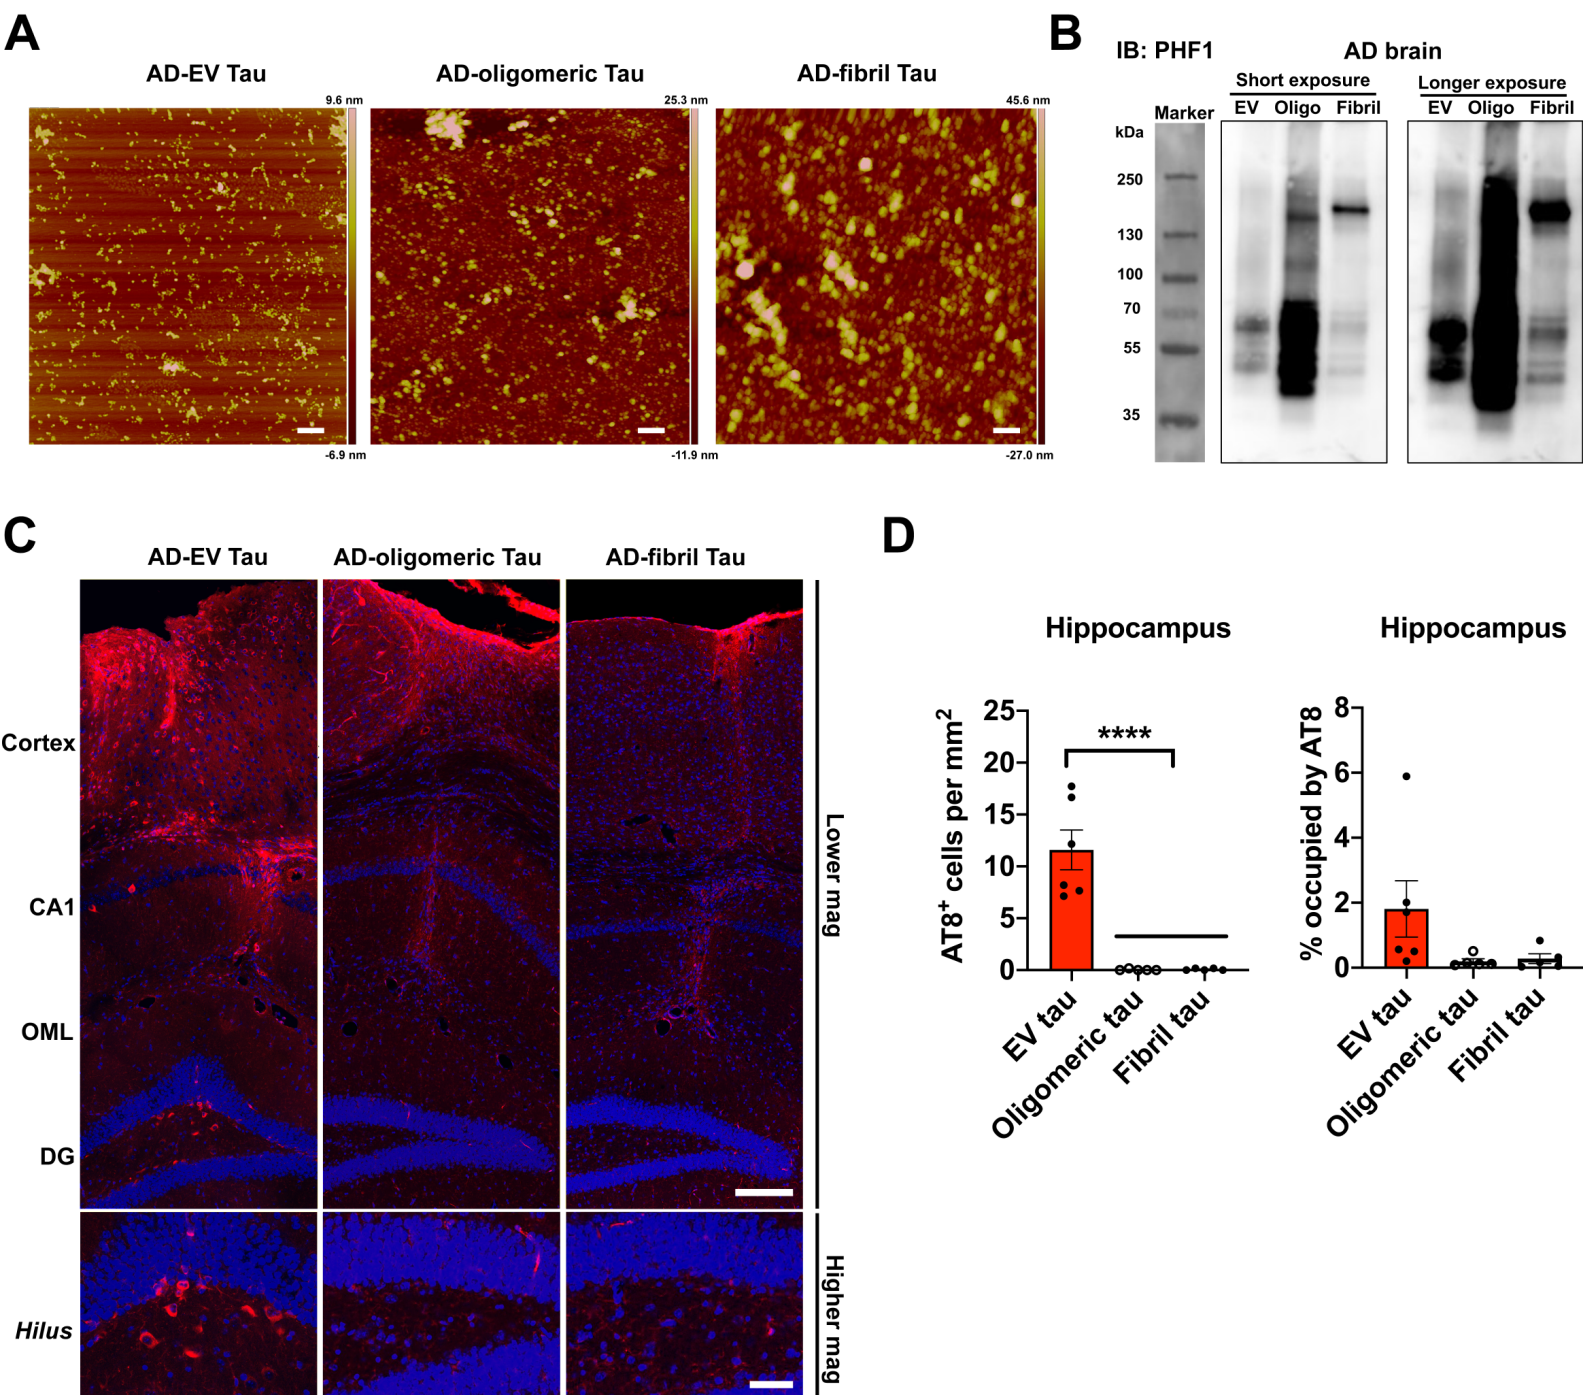

Figure 5

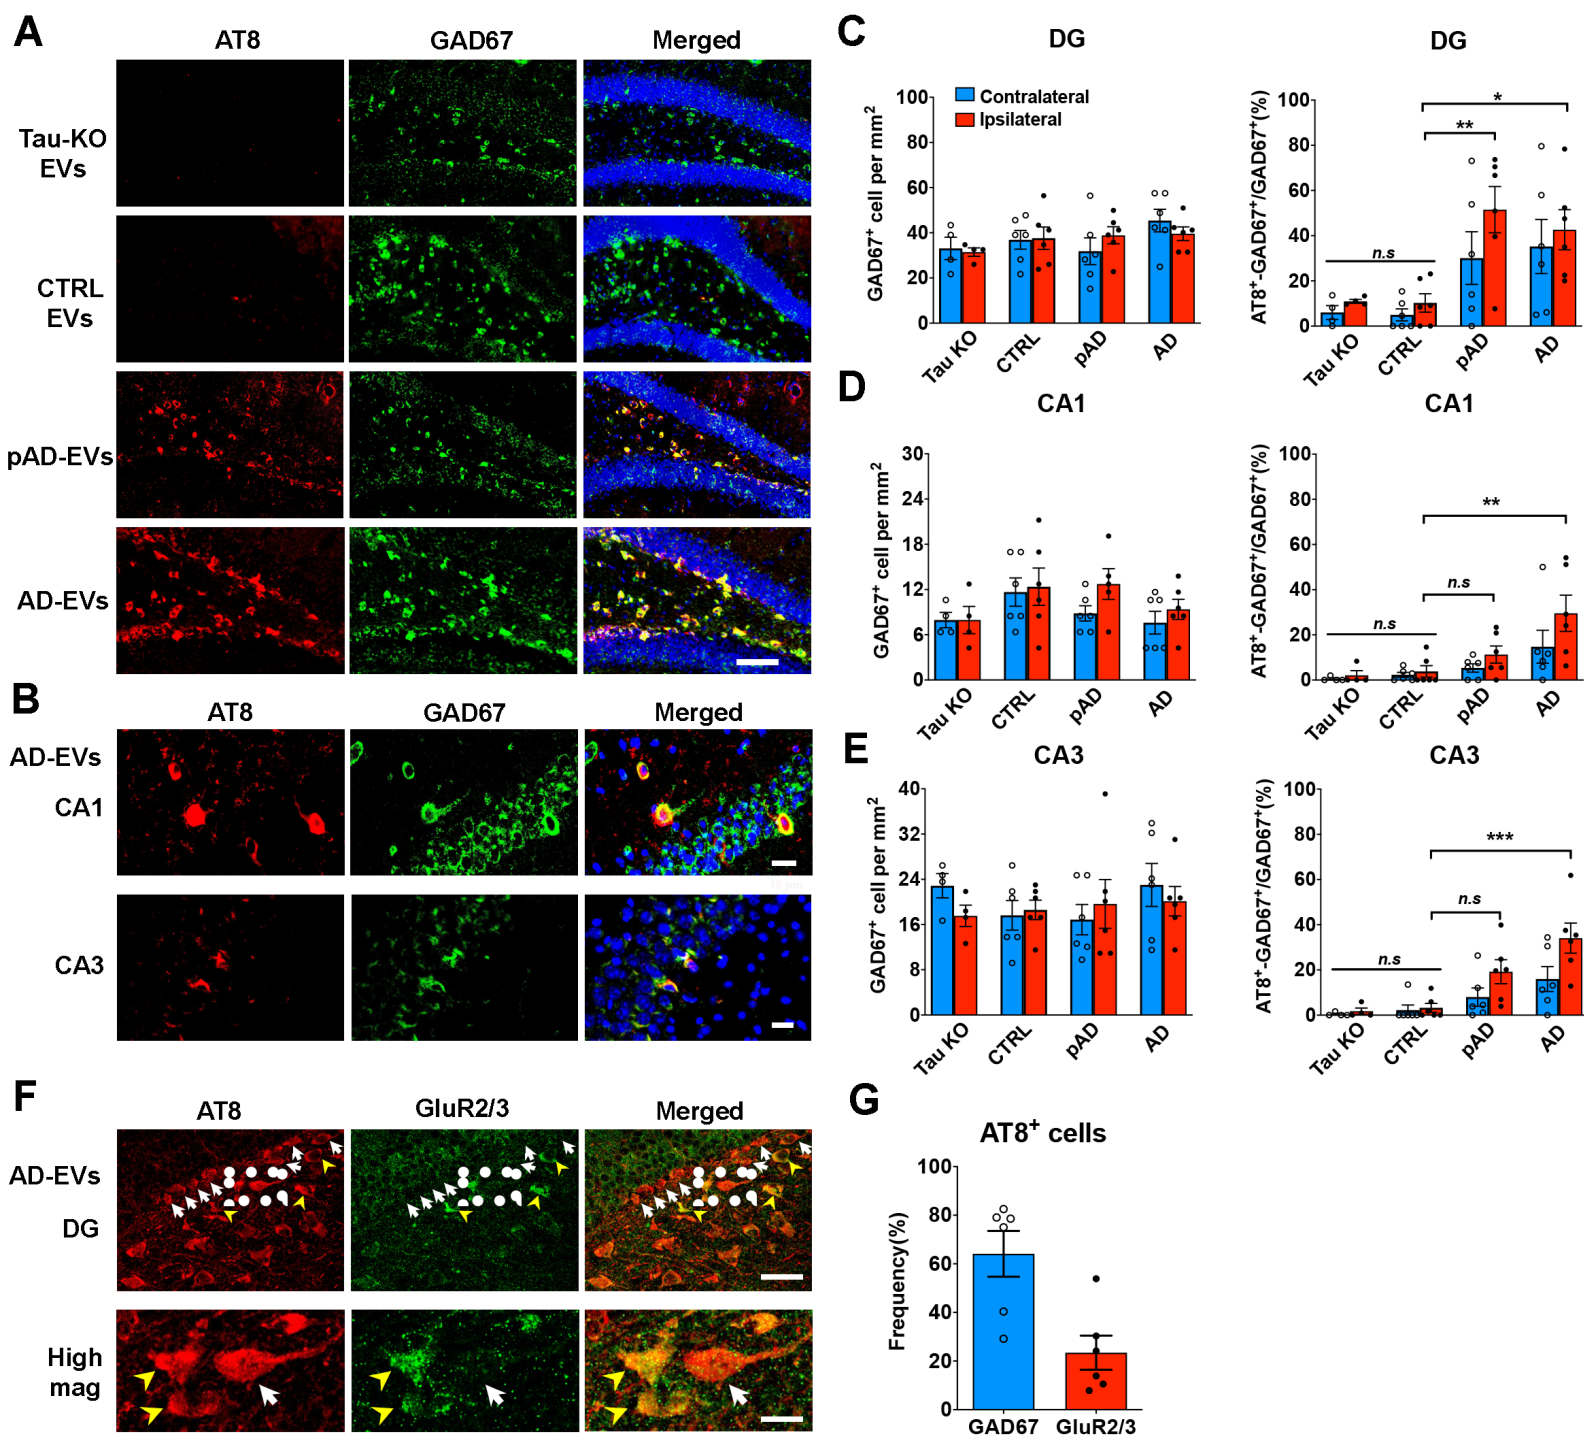



Figure 6

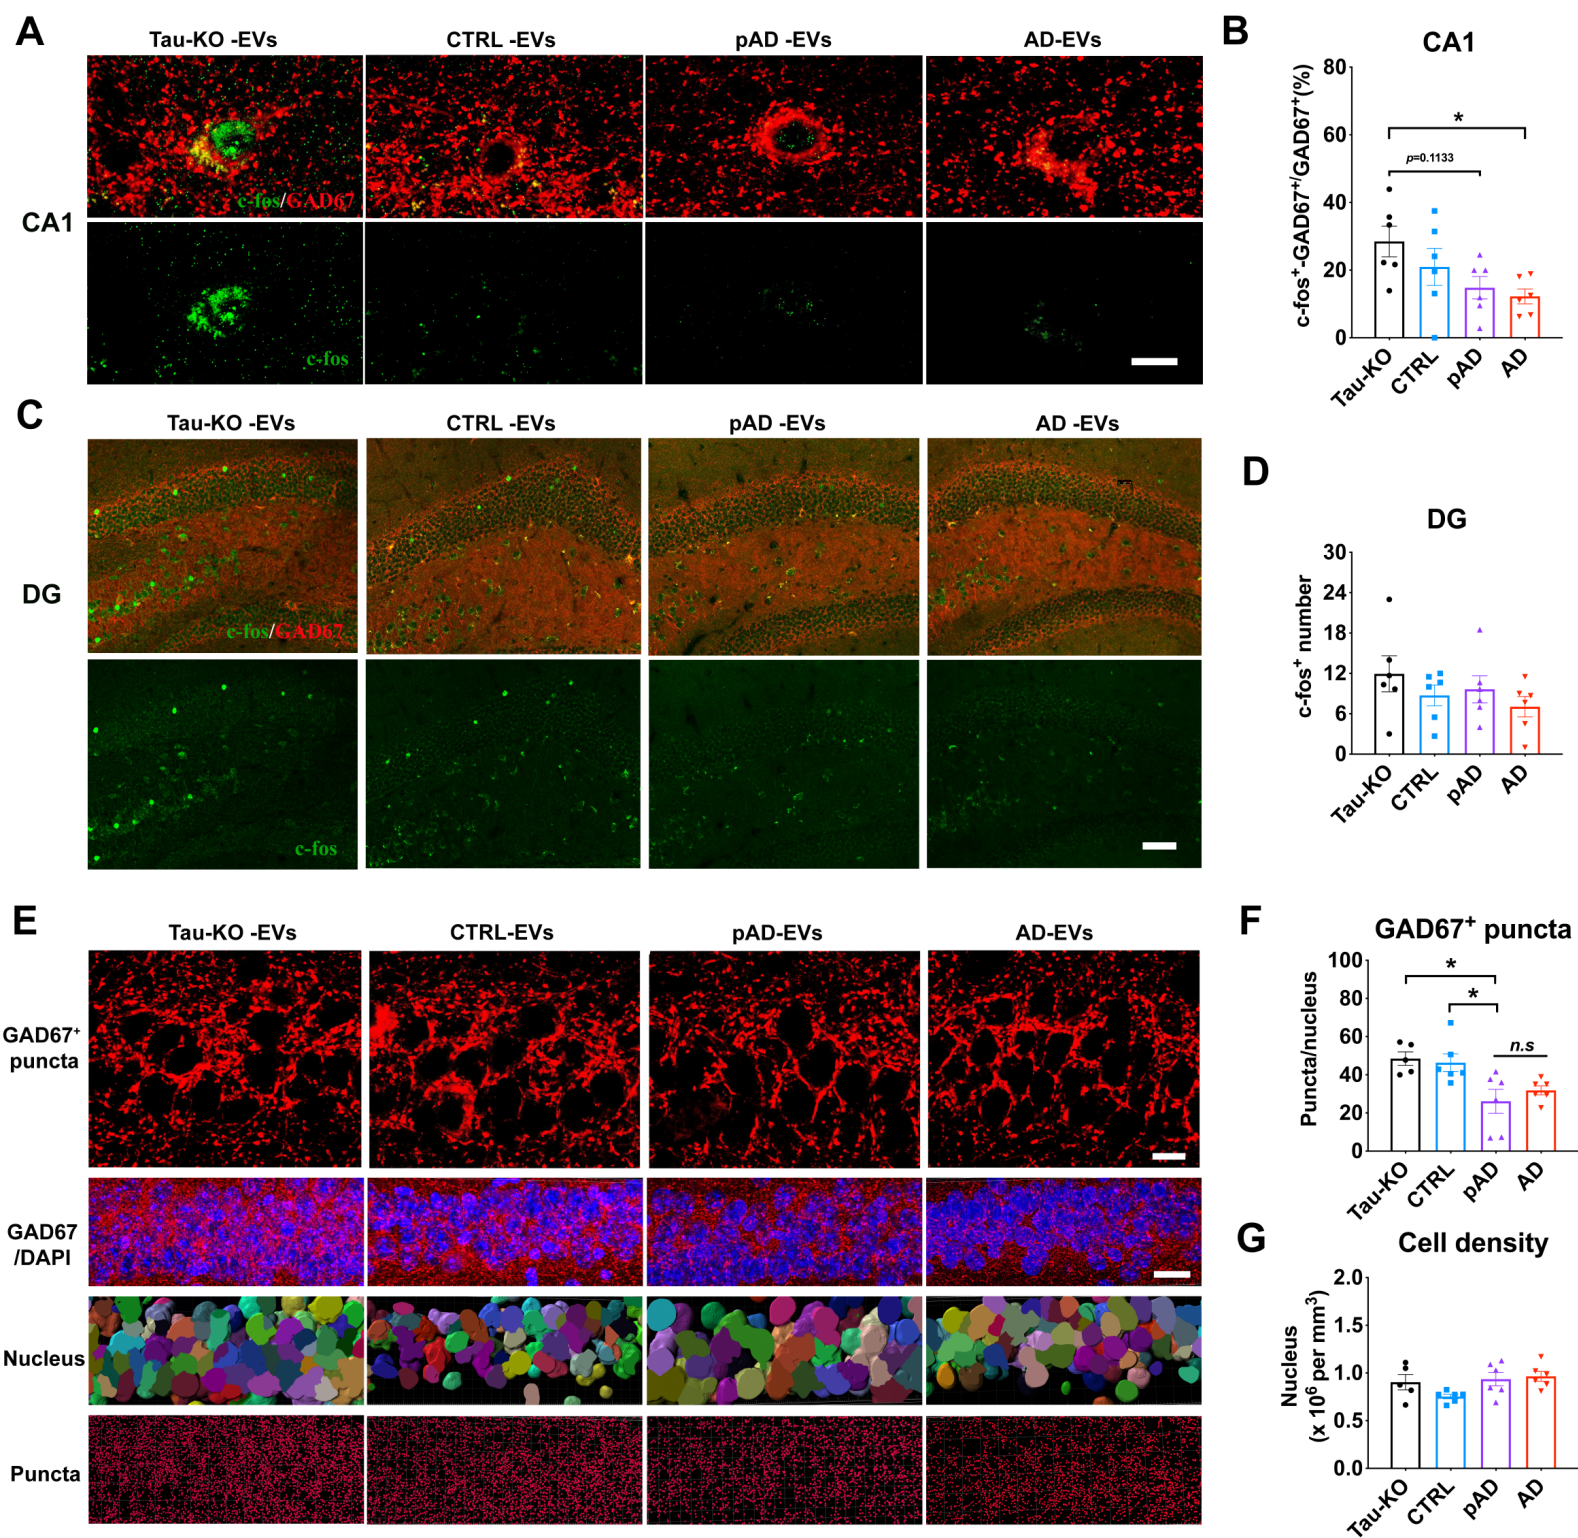

Figure 7

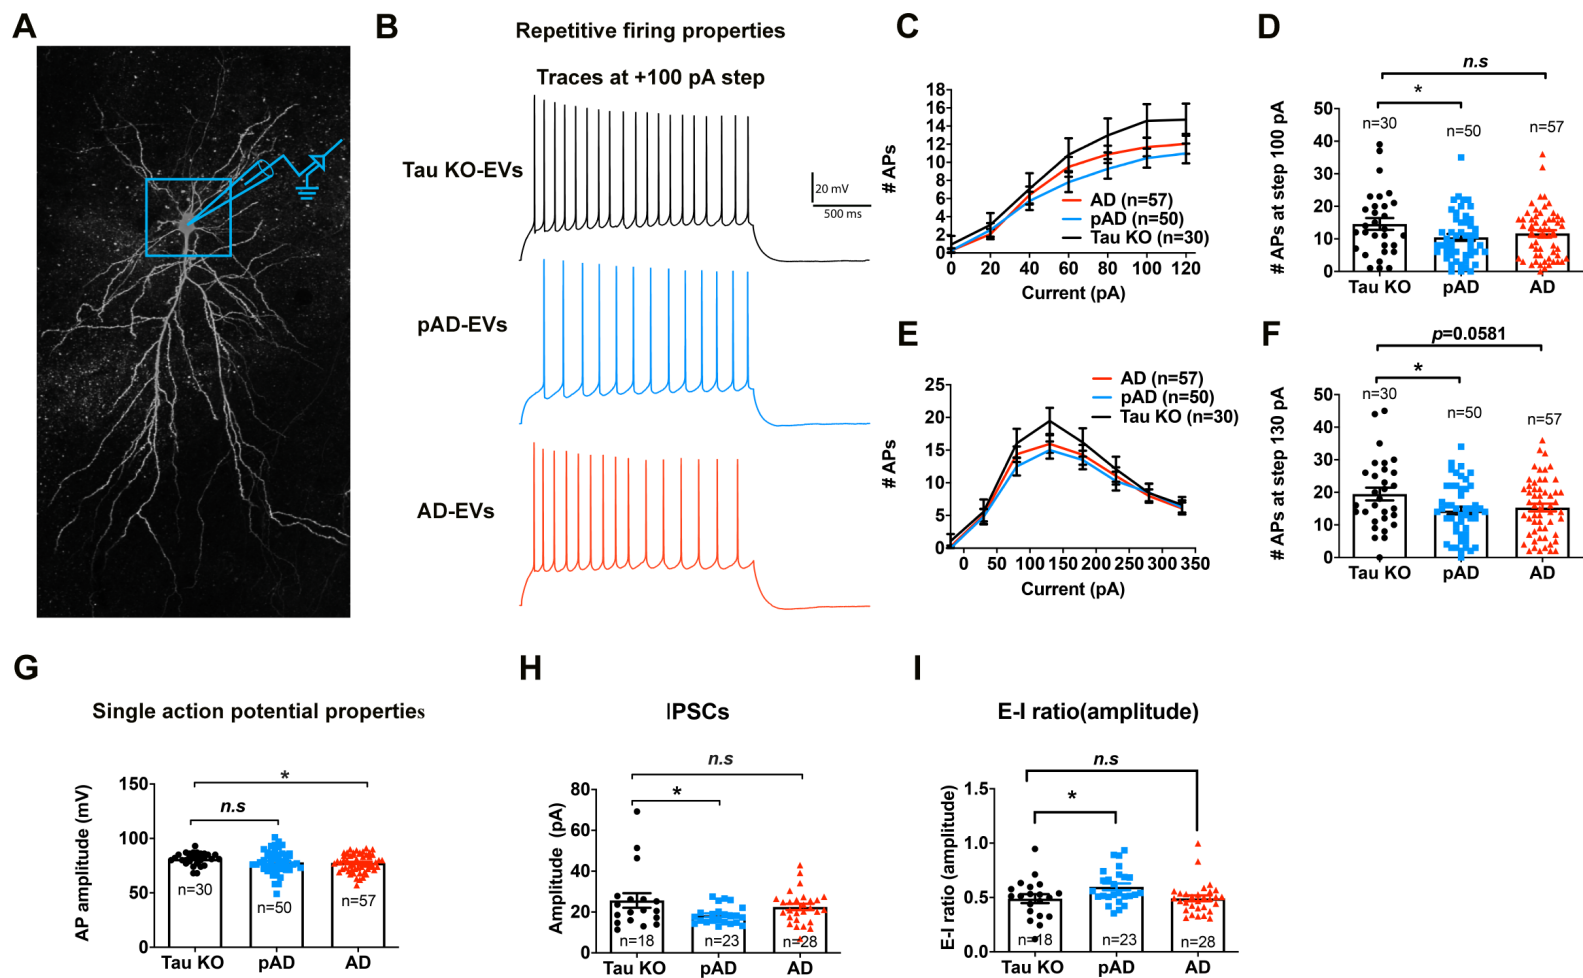

Source: https://www.biorxiv.org/content/10.1101/2020.03.15.992719v2.full.pdf
